# Supplementary material for: Identification and Characterization of Chickpea Genotypes for Early Flowering and High Seed Germination through Molecular Markers
Source: Research Square preprint supplement (doi:10.21203/rs.3.rs-1033758/v1), 2021-11-10
Supplement: Supplementary file 1 [file 525071f9ce1b431fcb860ff9.docx]

Supplementary Table 1- Detail of samples used for validation DNA fingerprinting of 50 chickpea germplasms

| Sr. No. | ICC No. | Alternate Accession Identifier | Origin |
| --- | --- | --- | --- |
| 1 | 67 | P 55 | India |
| 2 | 95 | P 74-1 | India |
| 3 | 283 | P 223-1 | India |
| 4 | 440 | P 326 | India |
| 5 | 456 | P 341 | India |
| 6 | 506 | P 386; BEG 78 | India |
| 7 | 637 | P 499-1 | India |
| 8 | 708 | P 556; A-293 | India |
| 9 | 762 | P 604; G 203 | India |
| 10 | 791 | P 625; G 320 | India |
| 11 | 867 | P 690; Larkapura 1 | India |
| 12 | 1052 | P 886; PI 217520-2 | Pakistan |
| 13 | 1083 | P 947; Kermanshah 193 | Iran |
| 14 | 1098 | P 972; Ardabil 163-1 | Iran |
| 15 | 1161 | P 1077; 6217 | Pakistan |
| 16 | 1164 | P 1081-1 | Nigeria |
| 17 | 1180 | P 1107; 44-3 | India |
| 18 | 1194 | P 1115; 518 | India |
| 19 | 1205 | P 1120; 838-3 | India |
| 20 | 1230 | P 1137; 694 | India |
| 21 | 1356 | P 1217; 718-9 | India |
| 22 | 1392 | P 1240; 141-1 | India |
| 23 | 1397 | P 1243-1 | India |
| 24 | 1398 | P 1244; 519 | India |
| 25 | 1422 | P 1255-3 | India |
| 26 | 1431 | P 1260-1 | India |
| 27 | 1510 | P 1297-2 | India |
| 28 | 1710 | P 1415; 6237 | India |
| 29 | 1715 | P 1417-1 | India |
| 30 | 1882 | P 1506-4 | India |
| 31 | 1915 | P 1548; EC 27657 | India |
| 32 | 1923 | P 1553; EC 34531 | India |
| 33 | 2065 | P 1662; PB 24 | India |
| 34 | 2072 | P 1670; PB 22 | India |
| 35 | 2210 | P 1781; Algeria 444 | Algeria |
| 36 | 2242 | P 1815; 1478 Xxi | India |
| 37 | 2263 | P 1857-1 | Iran |
| 38 | 2277 | P 1883-1 | Iran |
| 39 | 2507 | P 2386; 0562 0559 | Iran |
| 40 | 2580 | P 2583; 0747 0756 | Iran |
| 41 | 2629 | P 2642-1 | Iran |
| 42 | 2720 | P 2826; 0990 0999 | Iran |
| 43 | 2884 | P 3251-1 | Iran |
| 44 | 2919 | P 3318-1 | Iran |
| 45 | 2969 | P 3425-3 | Iran |
| 46 | 2990 | P 3454; 1587 1627 | Iran |
| 47 | 3218 | P 3774; 1900 1947 | Iran |
| 48 | 3230 | P 3788-2 | Iran |
| 49 | 3325 | P 3971; 2099 2144 | Cyprus |
| 50 | 3362 | P 4051-3 | Iran |
