# Supplementary material for: Identification and Characterization of Chickpea Genotypes for Early Flowering and High Seed Germination through Molecular Markers
Source: Research Square preprint supplement (doi:10.21203/rs.3.rs-1033758/v1), 2021-11-10
Supplement: Supplementary file 2 [file 691443b661915797be4ecf24.docx]

Supplementary Table 2- DNA fingerprint of 50 chickpea germplasms with 23 ISSR markers

|  | | | | | | | | | Accession number | | | | | | | | | | | | | | | | | | | | | | | | | | | | | | | | | | | | | | | | | | | | | | | | | | | | | | | | | | | | | | | | | | | | | | | | | | | | | | | | | | | | | | | | | | | | | | | | | | | | | | | | | | | | | | | | | | | | | | | | | | | | | | | | | | | | | | | | | | | | | | | | | | | | | | | | | | | | | | | | | | | | | | | | | | | | | | | | | | | | | | | | | | | | | | | | | | | | | | | | | | | | | | | | | | | | | | | | | | | | | | | | | | | | | | | | | | | | | | | | |
| --- | --- | --- | --- | --- | --- | --- | --- | --- | --- | --- | --- | --- | --- | --- | --- | --- | --- | --- | --- | --- | --- | --- | --- | --- | --- | --- | --- | --- | --- | --- | --- | --- | --- | --- | --- | --- | --- | --- | --- | --- | --- | --- | --- | --- | --- | --- | --- | --- | --- | --- | --- | --- | --- | --- | --- | --- | --- | --- | --- | --- | --- | --- | --- | --- | --- | --- | --- | --- | --- | --- | --- | --- | --- | --- | --- | --- | --- | --- | --- | --- | --- | --- | --- | --- | --- | --- | --- | --- | --- | --- | --- | --- | --- | --- | --- | --- | --- | --- | --- | --- | --- | --- | --- | --- | --- | --- | --- | --- | --- | --- | --- | --- | --- | --- | --- | --- | --- | --- | --- | --- | --- | --- | --- | --- | --- | --- | --- | --- | --- | --- | --- | --- | --- | --- | --- | --- | --- | --- | --- | --- | --- | --- | --- | --- | --- | --- | --- | --- | --- | --- | --- | --- | --- | --- | --- | --- | --- | --- | --- | --- | --- | --- | --- | --- | --- | --- | --- | --- | --- | --- | --- | --- | --- | --- | --- | --- | --- | --- | --- | --- | --- | --- | --- | --- | --- | --- | --- | --- | --- | --- | --- | --- | --- | --- | --- | --- | --- | --- | --- | --- | --- | --- | --- | --- | --- | --- | --- | --- | --- | --- | --- | --- | --- | --- | --- | --- | --- | --- | --- | --- | --- | --- | --- | --- | --- | --- | --- | --- | --- | --- | --- | --- | --- | --- | --- | --- | --- | --- | --- | --- | --- | --- | --- | --- | --- | --- | --- | --- | --- |
| 1 | | | | | | | | 2 | | | | | | 3 | | | | | | | 4 | | | | | | 5 | | | | | | | 6 | | | | | | | 7 | | | | | | 8 | | | | | 9 | | | | | 10 | | | | | 11 | | | | | 12 | | | | | 13 | | | | | 14 | | | | | 15 | | | | | | 16 | | | | 17 | | | | | 18 | | | | | 19 | | | | | | 20 | | | | | 21 | | | | | 22 | | | | | 23 | | | | 24 | | | | | | 25 | | | | 26 | | | | | 27 | | | | | 28 | | | | | 29 | | | | | 30 | | | | | 31 | | | | | 32 | | | | | 33 | | | | 34 | | | | 35 | | | | 36 | | | | 37 | | | 38 | | | | 39 | | | | 40 | | | | | 41 | | | 42 | | | | | 43 | | | | 44 | | | 45 | | | | 46 | | | | 47 | | | | | 48 | | | | 49 | | | | 50 |
| **UBC**  **807** | | | | 150 | | | |  | | |  | | | |  | | | | | |  | | | | | |  | | | | | | |  | | | | | | | |  | | | | | |  | | | | | | | | |  | | | | |  | | | | |  | | | | |  | | | | | 1 | | | | | | 1 | | | | | 1 | | | | | 1 | | | | | 1 | | | | |  | | | | |  | | | | |  | | | | |  | | | | |  | | | | |  | | | | |  | | | | | 1 | | | | |  | | | | |  | | | | |  | | | | | 1 | | | | |  | | | | |  | | | | | 1 | | | | | 1 | | | | |  | | | |  | | | | 1 | | | | 1 | | | 1 | | | | 1 | | | |  | | | | 1 | | | | 1 | | | | |  | | |  | | | |  | | | |  | | | |  | | | | |  | | | |  | | | | 1 | | |
| **A** | | | | **200** | | | |  | | |  | | | |  | | | | | |  | | | | | |  | | | | | | |  | | | | | | | |  | | | | | | 1 | | | | | | | | | 1 | | | | | 1 | | | | | 1 | | | | | 1 | | | | | 1 | | | | | | 1 | | | | | 1 | | | | | 1 | | | | | 1 | | | | | 1 | | | | | 1 | | | | | 1 | | | | | 1 | | | | | 1 | | | | | 1 | | | | | 1 | | | | | 1 | | | | | 1 | | | | | 1 | | | | | 1 | | | | | 1 | | | | | 1 | | | | | 1 | | | | |  | | | | |  | | | | | 1 | | | | 1 | | | | 1 | | | | 1 | | | 1 | | | | 1 | | | | 1 | | | | 1 | | | | 1 | | | | | 1 | | | 1 | | | | 1 | | | | 1 | | | | 1 | | | | | 1 | | | | 1 | | | | 1 | | |
| **B** | | | | **250** | | | | 1 | | |  | | | |  | | | | | |  | | | | | | 1 | | | | | | | 1 | | | | | | | | 1 | | | | | | 1 | | | | | | | | |  | | | | |  | | | | |  | | | | |  | | | | |  | | | | | |  | | | | |  | | | | |  | | | | |  | | | | |  | | | | |  | | | | |  | | | | |  | | | | |  | | | | |  | | | | |  | | | | |  | | | | |  | | | | |  | | | | |  | | | | |  | | | | |  | | | | |  | | | | |  | | | | |  | | | | |  | | | |  | | | |  | | | |  | | |  | | | |  | | | |  | | | |  | | | |  | | | | |  | | |  | | | |  | | | |  | | | |  | | | | |  | | | |  | | | |  | | |
| **C** | | | | **280** | | | |  | | |  | | | |  | | | | | | 1 | | | | | |  | | | | | | |  | | | | | | | |  | | | | | | 1 | | | | | | | | |  | | | | |  | | | | |  | | | | |  | | | | |  | | | | | |  | | | | |  | | | | |  | | | | |  | | | | |  | | | | |  | | | | |  | | | | |  | | | | |  | | | | |  | | | | |  | | | | |  | | | | |  | | | | |  | | | | |  | | | | |  | | | | | 1 | | | | |  | | | | |  | | | | |  | | | | |  | | | |  | | | |  | | | |  | | |  | | | |  | | | |  | | | |  | | | |  | | | | |  | | |  | | | |  | | | |  | | | |  | | | | |  | | | |  | | | |  | | |
| **D** | | | | **300** | | | |  | | | 1 | | | | 1 | | | | | | 1 | | | | | |  | | | | | | | 1 | | | | | | | |  | | | | | | 1 | | | | | | | | |  | | | | |  | | | | |  | | | | |  | | | | | 1 | | | | | | 1 | | | | | 1 | | | | | 1 | | | | | 1 | | | | | 1 | | | | | 1 | | | | | 1 | | | | | 1 | | | | | 1 | | | | | 1 | | | | | 1 | | | | | 1 | | | | | 1 | | | | | 1 | | | | | 1 | | | | | 1 | | | | | 1 | | | | | 1 | | | | | 1 | | | | | 1 | | | | | 1 | | | | 1 | | | |  | | | |  | | | 1 | | | | 1 | | | | 1 | | | | 1 | | | | 1 | | | | | 1 | | | 1 | | | | 1 | | | | 1 | | | | 1 | | | | | 1 | | | | 1 | | | | 1 | | |
| **E** | | | | **320** | | | |  | | |  | | | |  | | | | | |  | | | | | |  | | | | | | |  | | | | | | | |  | | | | | |  | | | | | | | | | 1 | | | | | 1 | | | | | 1 | | | | | 1 | | | | | 1 | | | | | | 1 | | | | | 1 | | | | | 1 | | | | | 1 | | | | | 1 | | | | | 1 | | | | | 1 | | | | | 1 | | | | | 1 | | | | | 1 | | | | | 1 | | | | | 1 | | | | | 1 | | | | | 1 | | | | | 1 | | | | | 1 | | | | | 1 | | | | | 1 | | | | | 1 | | | | | 1 | | | | | 1 | | | | 1 | | | | 1 | | | | 1 | | | 1 | | | | 1 | | | | 1 | | | | 1 | | | | 1 | | | | |  | | | 1 | | | | 1 | | | | 1 | | | | 1 | | | | | 1 | | | | 1 | | | | 1 | | |
| **F** | | | | **350** | | | |  | | |  | | | |  | | | | | | 1 | | | | | |  | | | | | | |  | | | | | | | |  | | | | | |  | | | | | | | | | 1 | | | | | 1 | | | | | 1 | | | | | 1 | | | | |  | | | | | |  | | | | |  | | | | |  | | | | |  | | | | |  | | | | |  | | | | |  | | | | |  | | | | |  | | | | |  | | | | |  | | | | | 1 | | | | | 1 | | | | | 1 | | | | | 1 | | | | |  | | | | | 1 | | | | |  | | | | |  | | | | |  | | | | |  | | | |  | | | |  | | | |  | | |  | | | | 1 | | | | 1 | | | | 1 | | | |  | | | | |  | | |  | | | |  | | | |  | | | |  | | | | |  | | | |  | | | |  | | |
| **G** | | | | **400** | | | |  | | |  | | | | 1 | | | | | | 1 | | | | | |  | | | | | | |  | | | | | | | | 1 | | | | | |  | | | | | | | | |  | | | | |  | | | | |  | | | | |  | | | | |  | | | | | |  | | | | |  | | | | |  | | | | |  | | | | |  | | | | |  | | | | |  | | | | |  | | | | |  | | | | |  | | | | | 1 | | | | |  | | | | |  | | | | |  | | | | |  | | | | |  | | | | | 1 | | | | |  | | | | | 1 | | | | | 1 | | | | |  | | | |  | | | |  | | | |  | | |  | | | |  | | | | 1 | | | | 1 | | | | 1 | | | | | 1 | | | 1 | | | | 1 | | | | 1 | | | | 1 | | | | | 1 | | | | 1 | | | |  | | |
| **H** | | | | **500** | | | |  | | |  | | | | 1 | | | | | |  | | | | | |  | | | | | | | 1 | | | | | | | |  | | | | | |  | | | | | | | | |  | | | | |  | | | | |  | | | | |  | | | | |  | | | | | |  | | | | |  | | | | |  | | | | |  | | | | |  | | | | |  | | | | | 1 | | | | | 1 | | | | | 1 | | | | | 1 | | | | | 1 | | | | |  | | | | |  | | | | |  | | | | |  | | | | |  | | | | |  | | | | |  | | | | |  | | | | |  | | | | | 1 | | | | 1 | | | |  | | | |  | | |  | | | |  | | | |  | | | |  | | | | 1 | | | | |  | | |  | | | |  | | | |  | | | |  | | | | |  | | | |  | | | | 1 | | |
| **I** | | | | **520** | | | |  | | |  | | | |  | | | | | |  | | | | | |  | | | | | | |  | | | | | | | |  | | | | | |  | | | | | | | | |  | | | | |  | | | | |  | | | | |  | | | | |  | | | | | |  | | | | |  | | | | |  | | | | |  | | | | |  | | | | |  | | | | |  | | | | |  | | | | |  | | | | |  | | | | |  | | | | | 1 | | | | | 1 | | | | | 1 | | | | | 1 | | | | |  | | | | |  | | | | |  | | | | |  | | | | |  | | | | |  | | | |  | | | |  | | | |  | | |  | | | |  | | | |  | | | |  | | | |  | | | | |  | | |  | | | |  | | | |  | | | |  | | | | |  | | | |  | | | |  | | |
| **J** | | | | **550** | | | |  | | |  | | | |  | | | | | |  | | | | | |  | | | | | | |  | | | | | | | |  | | | | | |  | | | | | | | | | 1 | | | | | 1 | | | | | 1 | | | | | 1 | | | | |  | | | | | |  | | | | |  | | | | |  | | | | |  | | | | |  | | | | |  | | | | |  | | | | |  | | | | |  | | | | |  | | | | |  | | | | |  | | | | |  | | | | |  | | | | |  | | | | |  | | | | |  | | | | |  | | | | | 1 | | | | | 1 | | | | | 1 | | | | 1 | | | |  | | | |  | | |  | | | | 1 | | | | 1 | | | |  | | | |  | | | | | 1 | | | 1 | | | | 1 | | | | 1 | | | | 1 | | | | | 1 | | | | 1 | | | |  | | |
| **K** | | | | **600** | | | |  | | |  | | | |  | | | | | |  | | | | | |  | | | | | | |  | | | | | | | | 1 | | | | | | 1 | | | | | | | | | 1 | | | | | 1 | | | | | 1 | | | | |  | | | | |  | | | | | |  | | | | |  | | | | |  | | | | |  | | | | |  | | | | |  | | | | |  | | | | |  | | | | |  | | | | |  | | | | |  | | | | |  | | | | |  | | | | |  | | | | |  | | | | |  | | | | |  | | | | |  | | | | |  | | | | |  | | | | |  | | | |  | | | |  | | | |  | | |  | | | |  | | | |  | | | |  | | | | 1 | | | | |  | | |  | | | |  | | | |  | | | |  | | | | |  | | | |  | | | |  | | |
| **L** | | | | **650** | | | |  | | |  | | | |  | | | | | |  | | | | | |  | | | | | | |  | | | | | | | |  | | | | | | 1 | | | | | | | | |  | | | | |  | | | | |  | | | | |  | | | | |  | | | | | |  | | | | |  | | | | |  | | | | |  | | | | |  | | | | |  | | | | |  | | | | |  | | | | |  | | | | |  | | | | |  | | | | |  | | | | |  | | | | |  | | | | |  | | | | |  | | | | |  | | | | |  | | | | |  | | | | |  | | | | |  | | | |  | | | |  | | | |  | | |  | | | |  | | | |  | | | |  | | | |  | | | | |  | | |  | | | |  | | | |  | | | |  | | | | |  | | | |  | | | |  | | |
| **UBC 808** | | | | |  | | | |  | | | | | | | | | |  | | | | | |  | | | | | | |  | | | | | | |  | | | | | | |  | | | | | | |  | | | | |  | | | | |  | | | | |  | | | | | |  | | | | |  | | | | |  | | | | |  | | | | |  | | | | |  | | | | |  | | | | |  | | | | |  | | | | |  | | | | |  | | | | |  | | | | |  | | | | |  | | | | |  | | | | |  | | | | |  | | | | |  | | | | |  | | | | |  | | | | |  | | | | |  | | | | |  | | | |  | | | |  | | | |  | | |  | | | |  | | | |  | | | |  | | | |  | | | | |  | | |  | | | |  | | | |  | | | |  | | | | |  | | | |  | | | |  | |
| **A** | | | | **320** | | | | 1 | | | 1 | | | | 1 | | | | | | 1 | | | | | | 1 | | | | | | | 1 | | | | | | | | 1 | | | | | | 1 | | | | | | | | | 1 | | | | | 1 | | | | | 1 | | | | | 1 | | | | | 1 | | | | | | 1 | | | | | 1 | | | | | 1 | | | | | 1 | | | | | 1 | | | | | 1 | | | | | 1 | | | | | 1 | | | | | 1 | | | | | 1 | | | | | 1 | | | | | 1 | | | | | 1 | | | | | 1 | | | | | 1 | | | | | 1 | | | | | 1 | | | | | 1 | | | | | 1 | | | | | 1 | | | | | 1 | | | | 1 | | | | 1 | | | | 1 | | | 1 | | | |  | | | |  | | | |  | | | |  | | | | |  | | |  | | | |  | | | |  | | | |  | | | | |  | | | |  | | | |  | | |
| **B** | | | | **350** | | | | 1 | | | 1 | | | | 1 | | | | | | 1 | | | | | | 1 | | | | | | | 1 | | | | | | | | 1 | | | | | | 1 | | | | | | | | | 1 | | | | | 1 | | | | | 1 | | | | | 1 | | | | | 1 | | | | | | 1 | | | | | 1 | | | | | 1 | | | | | 1 | | | | | 1 | | | | | 1 | | | | | 1 | | | | | 1 | | | | | 1 | | | | | 1 | | | | | 1 | | | | | 1 | | | | | 1 | | | | | 1 | | | | | 1 | | | | | 1 | | | | | 1 | | | | | 1 | | | | | 1 | | | | | 1 | | | | | 1 | | | | 1 | | | | 1 | | | | 1 | | |  | | | |  | | | |  | | | |  | | | |  | | | | |  | | |  | | | |  | | | |  | | | |  | | | | |  | | | |  | | | |  | | |
| **C** | | | **500** | | | | | |  | | | | | | |  | | | | | | 1 | | | | | | | 1 | | | | | | 1 | | | | | | 1 | | | | | | | | 1 | | | | | | 1 | | | | | |  | | | | |  | | | | | 1 | | | | | 1 | | | | |  | | | | | 1 | | | | | 1 | | | | | | 1 | | | |  | | | | | 1 | | | | | 1 | | | | | | 1 | | | | | 1 | | | | | 1 | | | | | 1 | | | | 1 | | | | | |  | | | |  | | | | | 1 | | | | | 1 | | | | | 1 | | | | | 1 | | | | | 1 | | | | |  | | | | |  | | | |  | | | |  | | | |  | | | |  | | |  | | | |  | | | |  | | | | |  | | |  | | | | |  | | | |  | | |  | | | |  | | | |  | | | | |  | | | |  | | | |  |
| **D** | **550** | | | | | 1 | | | | | |  | | | | | | 1 | | | | | | 1 | | | | | | | 1 | | | | | | | 1 | | | | | | | 1 | | | | | | 1 | | | | | | | | 1 | | | | | 1 | | | | | 1 | | | | | | 1 | | | | | 1 | | | | | 1 | | | | | 1 | | | | | 1 | | | | |  | | | | | 1 | | | | | 1 | | | | | 1 | | | | | 1 | | | | | 1 | | | | | 1 | | | | | 1 | | | | | 1 | | | | |  | | | | | 1 | | | | | 1 | | | | | 1 | | | | | 1 | | | | | 1 | | | | | 1 | | | | | 1 | | | | 1 | | | | 1 | | | | 1 | | | |  | | |  | | | |  | | | |  | | | |  | | | |  | | | | |  | | |  | | | |  | | | |  | | | |  | | | | |  | | | |  | | | |  | |
| **E** | **800** | | | | |  | | | | | |  | | | | | |  | | | | | |  | | | | | | | 1 | | | | | | |  | | | | | | |  | | | | | |  | | | | | | | | 1 | | | | |  | | | | | 1 | | | | | | 1 | | | | |  | | | | | 1 | | | | | 1 | | | | | 1 | | | | |  | | | | |  | | | | | 1 | | | | | 1 | | | | | 1 | | | | | 1 | | | | | 1 | | | | | 1 | | | | |  | | | | |  | | | | | 1 | | | | | 1 | | | | |  | | | | | 1 | | | | | 1 | | | | |  | | | | |  | | | |  | | | | 1 | | | | 1 | | | |  | | |  | | | | 1 | | | | 1 | | | | 1 | | | |  | | | | |  | | |  | | | |  | | | |  | | | |  | | | | |  | | | |  | | | |  | |
| **F** | **1000** | | | | | 1 | | | | | |  | | | | | | 1 | | | | | | 1 | | | | | | | 1 | | | | | | | 1 | | | | | | | 1 | | | | | | 1 | | | | | | | | 1 | | | | |  | | | | | 1 | | | | | | 1 | | | | | 1 | | | | | 1 | | | | | 1 | | | | | 1 | | | | |  | | | | | 1 | | | | | 1 | | | | | 1 | | | | | 1 | | | | | 1 | | | | | 1 | | | | | 1 | | | | | 1 | | | | |  | | | | | 1 | | | | | 1 | | | | | 1 | | | | | 1 | | | | | 1 | | | | | 1 | | | | | 1 | | | | 1 | | | | 1 | | | | 1 | | | | 1 | | | 1 | | | | 1 | | | | 1 | | | | 1 | | | | 1 | | | | | 1 | | | 1 | | | | 1 | | | | 1 | | | | 1 | | | | | 1 | | | | 1 | | | | 1 | |
| **G** | **1400** | | | | | 1 | | | | | |  | | | | | |  | | | | | |  | | | | | | | 1 | | | | | | |  | | | | | | | 1 | | | | | | 1 | | | | | | | |  | | | | |  | | | | | 1 | | | | | | 1 | | | | | 1 | | | | | 1 | | | | | 1 | | | | |  | | | | |  | | | | | 1 | | | | | 1 | | | | | 1 | | | | | 1 | | | | | 1 | | | | | 1 | | | | | 1 | | | | |  | | | | |  | | | | | 1 | | | | |  | | | | | 1 | | | | | 1 | | | | | 1 | | | | |  | | | | |  | | | |  | | | |  | | | |  | | | | 1 | | |  | | | |  | | | |  | | | |  | | | |  | | | | |  | | |  | | | |  | | | |  | | | |  | | | | |  | | | |  | | | |  | |
| **UBC 809** | | | | | |  | | | | | | |  | | | | | | |  | | | | | |  | | | | | | |  | | | | | | |  | | | | | | |  | | | | | | |  | | | | |  | | | | |  | | | | |  | | | | | |  | | | | |  | | | | |  | | | | |  | | | | |  | | | | |  | | | | |  | | | | |  | | | | |  | | | | |  | | | | |  | | | | |  | | | | |  | | | | |  | | | | |  | | | | |  | | | | |  | | | | |  | | | | |  | | | | |  | | | | |  | | | | |  | | | |  | | | |  | | | |  | | | |  | | |  | | | |  | | | |  | | | |  | | | |  | | | | |  | | |  | | | |  | | | |  | | | |  | | | | |  | | | |  | | | |  | |
| **A** | **300** | | | | | 1 | | | | | | 1 | | | | | | 1 | | | | | | 1 | | | | | | | 1 | | | | | | | 1 | | | | | | | 1 | | | | | | 1 | | | | | | | | 1 | | | | | 1 | | | | | 1 | | | | | | 1 | | | | | 1 | | | | | 1 | | | | | 1 | | | | | 1 | | | | | 1 | | | | | 1 | | | | | 1 | | | | | 1 | | | | | 1 | | | | | 1 | | | | | 1 | | | | | 1 | | | | | 1 | | | | | 1 | | | | | 1 | | | | | 1 | | | | | 1 | | | | | 1 | | | | | 1 | | | | | 1 | | | | | 1 | | | | 1 | | | | 1 | | | | 1 | | | | 1 | | | 1 | | | | 1 | | | | 1 | | | | 1 | | | | 1 | | | | | 1 | | | 1 | | | | 1 | | | | 1 | | | | 1 | | | | | 1 | | | | 1 | | | | 1 | |
| **B** | **500** | | | | | 1 | | | | | |  | | | | | | 1 | | | | | | 1 | | | | | | | 1 | | | | | | | 1 | | | | | | | 1 | | | | | | 1 | | | | | | | | 1 | | | | | 1 | | | | | 1 | | | | | | 1 | | | | | 1 | | | | | 1 | | | | | 1 | | | | | 1 | | | | | 1 | | | | | 1 | | | | | 1 | | | | | 1 | | | | | 1 | | | | | 1 | | | | | 1 | | | | | 1 | | | | | 1 | | | | | 1 | | | | | 1 | | | | | 1 | | | | | 1 | | | | | 1 | | | | | 1 | | | | | 1 | | | | | 1 | | | | 1 | | | | 1 | | | | 1 | | | | 1 | | | 1 | | | | 1 | | | | 1 | | | | 1 | | | | 1 | | | | | 1 | | | 1 | | | | 1 | | | | 1 | | | | 1 | | | | | 1 | | | | 1 | | | | 1 | |
| **C** | **760** | | | | |  | | | | | |  | | | | | |  | | | | | |  | | | | | | | 1 | | | | | | |  | | | | | | | 1 | | | | | | 1 | | | | | | | | 1 | | | | | 1 | | | | | 1 | | | | | | 1 | | | | | 1 | | | | | 1 | | | | |  | | | | | 1 | | | | |  | | | | | 1 | | | | | 1 | | | | |  | | | | | 1 | | | | |  | | | | |  | | | | | 1 | | | | | 1 | | | | |  | | | | |  | | | | | 1 | | | | | 1 | | | | | 1 | | | | | 1 | | | | | 1 | | | | |  | | | |  | | | | 1 | | | | 1 | | | |  | | | 1 | | | | 1 | | | | 1 | | | | 1 | | | |  | | | | |  | | | 1 | | | | 1 | | | | 1 | | | |  | | | | | 1 | | | | 1 | | | | 1 | |
| **D** | **1000** | | | | | 1 | | | | | |  | | | | | | 1 | | | | | | 1 | | | | | | | 1 | | | | | | | 1 | | | | | | | 1 | | | | | | 1 | | | | | | | | 1 | | | | | 1 | | | | | 1 | | | | | | 1 | | | | |  | | | | | 1 | | | | | 1 | | | | |  | | | | |  | | | | | 1 | | | | | 1 | | | | | 1 | | | | | 1 | | | | | 1 | | | | | 1 | | | | | 1 | | | | | 1 | | | | | 1 | | | | | 1 | | | | | 1 | | | | | 1 | | | | | 1 | | | | | 1 | | | | | 1 | | | | | 1 | | | | 1 | | | | 1 | | | | 1 | | | | 1 | | |  | | | | 1 | | | | 1 | | | | 1 | | | | 1 | | | | | 1 | | | 1 | | | | 1 | | | | 1 | | | | 1 | | | | | 1 | | | | 1 | | | | 1 | |
| **E** | **1200** | | | | |  | | | | | |  | | | | | | 1 | | | | | | 1 | | | | | | | 1 | | | | | | |  | | | | | | | 1 | | | | | | 1 | | | | | | | | 1 | | | | |  | | | | |  | | | | | |  | | | | | 1 | | | | |  | | | | |  | | | | |  | | | | | 1 | | | | | 1 | | | | | 1 | | | | | 1 | | | | | 1 | | | | | 1 | | | | | 1 | | | | | 1 | | | | |  | | | | |  | | | | | 1 | | | | | 1 | | | | | 1 | | | | | 1 | | | | | 1 | | | | |  | | | | | 1 | | | | 1 | | | | 1 | | | | 1 | | | |  | | |  | | | | 1 | | | | 1 | | | | 1 | | | | 1 | | | | | 1 | | | 1 | | | | 1 | | | | 1 | | | | 1 | | | | | 1 | | | | 1 | | | | 1 | |
|  |  | | | | |  | | | | | |  | | | | | |  | | | | | |  | | | | | | |  | | | | | | |  | | | | | | |  | | | | | |  | | | | | | | |  | | | | |  | | | | |  | | | | | |  | | | | |  | | | | |  | | | | |  | | | | |  | | | | |  | | | | |  | | | | |  | | | | |  | | | | |  | | | | |  | | | | |  | | | | |  | | | | |  | | | | |  | | | | |  | | | | |  | | | | |  | | | | |  | | | | |  | | | | |  | | | | |  | | | |  | | | |  | | | |  | | | |  | | |  | | | |  | | | |  | | | |  | | | |  | | | | |  | | |  | | | |  | | | |  | | | |  | | | | |  | | | |  | | | |  | |
| **UBC 810** | | | | | | |  | | |  | | | |  | | | | | | | | | | | | | |  | | | | | | | | |  | | | | | | |  | | | | | | | |  | | | | | | | |  | | | | |  | | | | |  | | |  | | | | |  | | | |  | | | | |  | | | | |  | | | |  | | | | | |  | | | | |  | | | | |  | | | |  | | | | |  | | | | |  | | | | |  | | | | | |  | | | |  | | | | | |  | | | | |  | | | | |  | | | | |  | | | | |  | | | | |  | | | | |  | | | | |  | | | |  | | | |  | | | |  | | |  | | | |  | | | |  | | | |  | | |  | | | | |  |  | | | | | |  | | | | |  | | | |  | | | |  |  | | | |  | | | |  | | | |
| **A** | | **300** | | | | | 1 | | |  | | | | 1 | | | | | | | | | | | | | | 1 | | | | | | | | | 1 | | | | | | | 1 | | | | | | | | 1 | | | | | | | | 1 | | | | | 1 | | | | | 1 | | | 1 | | | | | 1 | | | | 1 | | | | | 1 | | | | | 1 | | | | 1 | | | | | | 1 | | | | | 1 | | | | | 1 | | | | 1 | | | | | 1 | | | | | 1 | | | | |  | | | | | | 1 | | | | 1 | | | | | |  | | | | | 1 | | | | | 1 | | | | | 1 | | | | | 1 | | | | | 1 | | | | | 1 | | | | | 1 | | | | 1 | | | | 1 | | | | 1 | | | 1 | | | | 1 | | | | 1 | | | | 1 | | | 1 | | | | | 1 | 1 | | | | | | 1 | | | | | 1 | | | | 1 | | | | 1 | 1 | | | | 1 | | | | 1 | | | |
| **B** | | **400** | | | | |  | | |  | | | | 1 | | | | | | | | | | | | | | 1 | | | | | | | | | 1 | | | | | | | 1 | | | | | | | | 1 | | | | | | | | 1 | | | | | 1 | | | | | 1 | | | 1 | | | | | 1 | | | | 1 | | | | | 1 | | | | | 1 | | | | 1 | | | | | | 1 | | | | | 1 | | | | | 1 | | | | 1 | | | | | 1 | | | | | 1 | | | | |  | | | | | | 1 | | | | 1 | | | | | | 1 | | | | | 1 | | | | | 1 | | | | | 1 | | | | | 1 | | | | | 1 | | | | | 1 | | | | | 1 | | | | 1 | | | | 1 | | | | 1 | | |  | | | |  | | | | 1 | | | | 1 | | | 1 | | | | | 1 | 1 | | | | | | 1 | | | | | 1 | | | |  | | | | 1 | 1 | | | | 1 | | | |  | | | |
| **C** | | **500** | | | | |  | | |  | | | | 1 | | | | | | | | | | | | | | 1 | | | | | | | | | 1 | | | | | | | 1 | | | | | | | | 1 | | | | | | | | 1 | | | | | 1 | | | | | 1 | | | 1 | | | | | 1 | | | | 1 | | | | | 1 | | | | | 1 | | | | 1 | | | | | | 1 | | | | | 1 | | | | | 1 | | | | 1 | | | | | 1 | | | | | 1 | | | | |  | | | | | | 1 | | | | 1 | | | | | | 1 | | | | | 1 | | | | | 1 | | | | | 1 | | | | | 1 | | | | | 1 | | | | | 1 | | | | | 1 | | | | 1 | | | | 1 | | | | 1 | | | 1 | | | |  | | | | 1 | | | | 1 | | | 1 | | | | | 1 | 1 | | | | | | 1 | | | | | 1 | | | | 1 | | | | 1 | 1 | | | | 1 | | | | 1 | | | |
| **D** | | **600** | | | | |  | | |  | | | | 1 | | | | | | | | | | | | | | 1 | | | | | | | | | 1 | | | | | | | 1 | | | | | | | | 1 | | | | | | | | 1 | | | | | 1 | | | | | 1 | | | 1 | | | | | 1 | | | | 1 | | | | | 1 | | | | | 1 | | | |  | | | | | |  | | | | | 1 | | | | | 1 | | | | 1 | | | | | 1 | | | | | 1 | | | | |  | | | | | | 1 | | | | 1 | | | | | |  | | | | | 1 | | | | | 1 | | | | |  | | | | | 1 | | | | | 1 | | | | | 1 | | | | | 1 | | | | 1 | | | | 1 | | | | 1 | | |  | | | |  | | | | 1 | | | | 1 | | | 1 | | | | | 1 | 1 | | | | | | 1 | | | | | 1 | | | |  | | | | 1 | 1 | | | | 1 | | | |  | | | |
| **E** | | **700** | | | | | 1 | | |  | | | | 1 | | | | | | | | | | | | | | 1 | | | | | | | | | 1 | | | | | | | 1 | | | | | | | | 1 | | | | | | | | 1 | | | | | 1 | | | | | 1 | | | 1 | | | | | 1 | | | | 1 | | | | | 1 | | | | | 1 | | | | 1 | | | | | | 1 | | | | | 1 | | | | | 1 | | | | 1 | | | | | 1 | | | | | 1 | | | | | 1 | | | | | | 1 | | | | 1 | | | | | | 1 | | | | | 1 | | | | | 1 | | | | | 1 | | | | | 1 | | | | | 1 | | | | | 1 | | | | | 1 | | | | 1 | | | | 1 | | | | 1 | | | 1 | | | | 1 | | | | 1 | | | | 1 | | | 1 | | | | | 1 | 1 | | | | | | 1 | | | | | 1 | | | | 1 | | | | 1 | 1 | | | | 1 | | | | 1 | | | |
| **F** | | **1050** | | | | | 1 | | |  | | | | 1 | | | | | | | | | | | | | | 1 | | | | | | | | | 1 | | | | | | | 1 | | | | | | | | 1 | | | | | | | | 1 | | | | | 1 | | | | | 1 | | | 1 | | | | | 1 | | | | 1 | | | | | 1 | | | | | 1 | | | | 1 | | | | | | 1 | | | | | 1 | | | | | 1 | | | | 1 | | | | | 1 | | | | | 1 | | | | | 1 | | | | | | 1 | | | | 1 | | | | | | 1 | | | | | 1 | | | | | 1 | | | | | 1 | | | | | 1 | | | | | 1 | | | | | 1 | | | | | 1 | | | | 1 | | | | 1 | | | | 1 | | | 1 | | | |  | | | | 1 | | | | 1 | | | 1 | | | | | 1 | 1 | | | | | | 1 | | | | | 1 | | | | 1 | | | | 1 | 1 | | | | 1 | | | | 1 | | | |
| **G** | | **1100** | | | | |  | | |  | | | | 1 | | | | | | | | | | | | | | 1 | | | | | | | | | 1 | | | | | | |  | | | | | | | | 1 | | | | | | | | 1 | | | | | 1 | | | | | 1 | | | 1 | | | | | 1 | | | | 1 | | | | | 1 | | | | |  | | | |  | | | | | |  | | | | | 1 | | | | | 1 | | | | 1 | | | | | 1 | | | | | 1 | | | | |  | | | | | | 1 | | | | 1 | | | | | |  | | | | | 1 | | | | | 1 | | | | | 1 | | | | | 1 | | | | | 1 | | | | | 1 | | | | | 1 | | | | 1 | | | | 1 | | | | 1 | | | 1 | | | |  | | | | 1 | | | | 1 | | | 1 | | | | | 1 | 1 | | | | | | 1 | | | | | 1 | | | | 1 | | | | 1 | 1 | | | | 1 | | | | 1 | | | |
| **H** | | **1300** | | | | |  | | |  | | | | 1 | | | | | | | | | | | | | |  | | | | | | | | |  | | | | | | |  | | | | | | | |  | | | | | | | |  | | | | |  | | | | |  | | |  | | | | |  | | | |  | | | | |  | | | | |  | | | |  | | | | | |  | | | | |  | | | | |  | | | |  | | | | |  | | | | |  | | | | |  | | | | | | 1 | | | |  | | | | | |  | | | | | 1 | | | | | 1 | | | | | 1 | | | | |  | | | | |  | | | | |  | | | | |  | | | |  | | | |  | | | |  | | |  | | | |  | | | | 1 | | | | 1 | | | 1 | | | | |  | 1 | | | | | |  | | | | | 1 | | | | 1 | | | | 1 | 1 | | | | 1 | | | | 1 | | | |
|  | |  | | | | |  | | |  | | | |  | | | | | | | | | | | | | |  | | | | | | | | |  | | | | | | |  | | | | | | | |  | | | | | | | |  | | | | |  | | | | |  | | |  | | | | |  | | | |  | | | | |  | | | | |  | | | |  | | | | | |  | | | | |  | | | | |  | | | |  | | | | |  | | | | |  | | | | |  | | | | | |  | | | |  | | | | | |  | | | | |  | | | | |  | | | | |  | | | | |  | | | | |  | | | | |  | | | | |  | | | |  | | | |  | | | |  | | |  | | | |  | | | |  | | | |  | | |  | | | | |  |  | | | | | |  | | | | |  | | | |  | | | |  |  | | | |  | | | |  | | | |
| **UBC 812** | | | | | | |  | | |  | | | |  | | | | | | | | | | | | | |  | | | | | | | | |  | | | | | | |  | | | | | | | |  | | | | | | | |  | | | | |  | | | | |  | | |  | | | | |  | | | |  | | | | |  | | | | |  | | | |  | | | | | |  | | | | |  | | | | |  | | | |  | | | | |  | | | | |  | | | | |  | | | | | |  | | | |  | | | | | |  | | | | |  | | | | |  | | | | |  | | | | |  | | | | |  | | | | |  | | | | |  | | | |  | | | |  | | | |  | | |  | | | |  | | | |  | | | |  | | |  | | | | |  |  | | | | | |  | | | | |  | | | |  | | | |  |  | | | |  | | | |  | | | |
| **A** | | **250** | | | | |  | | |  | | | |  | | | | | | | | | | | | | |  | | | | | | | | |  | | | | | | |  | | | | | | | |  | | | | | | | |  | | | | |  | | | | |  | | |  | | | | |  | | | |  | | | | |  | | | | |  | | | |  | | | | | |  | | | | |  | | | | |  | | | |  | | | | |  | | | | |  | | | | |  | | | | | |  | | | | 1 | | | | | | 1 | | | | | 1 | | | | | 1 | | | | | 1 | | | | | 1 | | | | | 1 | | | | | 1 | | | | | 1 | | | |  | | | |  | | | |  | | | 1 | | | | 1 | | | |  | | | |  | | |  | | | | |  |  | | | | | |  | | | | |  | | | |  | | | |  |  | | | |  | | | |  | | | |
| **B** | | **300** | | | | | 1 | | |  | | | | 1 | | | | | | | | | | | | | | 1 | | | | | | | | | 1 | | | | | | | 1 | | | | | | | | 1 | | | | | | | |  | | | | |  | | | | |  | | |  | | | | |  | | | | 1 | | | | | 1 | | | | |  | | | |  | | | | | |  | | | | |  | | | | |  | | | |  | | | | |  | | | | |  | | | | |  | | | | | |  | | | | 1 | | | | | | 1 | | | | | 1 | | | | | 1 | | | | | 1 | | | | | 1 | | | | | 1 | | | | | 1 | | | | | 1 | | | | 1 | | | | 1 | | | | 1 | | | 1 | | | | 1 | | | | 1 | | | | 1 | | | 1 | | | | | 1 |  | | | | | |  | | | | |  | | | |  | | | |  |  | | | |  | | | |  | | | |
| **C** | | **450** | | | | | 1 | | |  | | | | 1 | | | | | | | | | | | | | | 1 | | | | | | | | | 1 | | | | | | | 1 | | | | | | | | 1 | | | | | | | |  | | | | |  | | | | |  | | |  | | | | |  | | | | 1 | | | | |  | | | | |  | | | |  | | | | | |  | | | | |  | | | | |  | | | |  | | | | |  | | | | |  | | | | |  | | | | | |  | | | | 1 | | | | | |  | | | | | 1 | | | | | 1 | | | | | 1 | | | | | 1 | | | | | 1 | | | | | 1 | | | | | 1 | | | | 1 | | | | 1 | | | | 1 | | | 1 | | | | 1 | | | | 1 | | | | 1 | | | 1 | | | | | 1 |  | | | | | | 1 | | | | |  | | | |  | | | |  |  | | | |  | | | |  | | | |
| **D** | | **500** | | | | |  | | |  | | | |  | | | | | | | | | | | | | |  | | | | | | | | |  | | | | | | |  | | | | | | | |  | | | | | | | |  | | | | |  | | | | |  | | |  | | | | |  | | | | 1 | | | | |  | | | | |  | | | |  | | | | | |  | | | | |  | | | | |  | | | |  | | | | |  | | | | |  | | | | |  | | | | | |  | | | | 1 | | | | | |  | | | | | 1 | | | | | 1 | | | | |  | | | | |  | | | | |  | | | | |  | | | | | 1 | | | | 1 | | | | 1 | | | | 1 | | | 1 | | | | 1 | | | | 1 | | | | 1 | | | 1 | | | | | 1 | 1 | | | | | | 1 | | | | | 1 | | | | 1 | | | | 1 | 1 | | | | 1 | | | | 1 | | | |
| **E** | | **550** | | | | | 1 | | |  | | | | 1 | | | | | | | | | | | | | | 1 | | | | | | | | | 1 | | | | | | | 1 | | | | | | | | 1 | | | | | | | |  | | | | | 1 | | | | | 1 | | | 1 | | | | |  | | | |  | | | | |  | | | | |  | | | | 1 | | | | | | 1 | | | | | 1 | | | | |  | | | |  | | | | |  | | | | |  | | | | |  | | | | | |  | | | | 1 | | | | | | 1 | | | | | 1 | | | | | 1 | | | | | 1 | | | | | 1 | | | | | 1 | | | | | 1 | | | | | 1 | | | | 1 | | | | 1 | | | | 1 | | | 1 | | | | 1 | | | | 1 | | | | 1 | | | 1 | | | | | 1 | 1 | | | | | | 1 | | | | | 1 | | | | 1 | | | | 1 | 1 | | | | 1 | | | | 1 | | | |
| **F** | | **700** | | | | | 1 | | | 1 | | | |  | | | | | | | | | | | | | | 1 | | | | | | | | | 1 | | | | | | |  | | | | | | | | 1 | | | | | | | |  | | | | | 1 | | | | | 1 | | | 1 | | | | | 1 | | | |  | | | | |  | | | | | 1 | | | | 1 | | | | | | 1 | | | | | 1 | | | | | 1 | | | | 1 | | | | |  | | | | | 1 | | | | | 1 | | | | | | 1 | | | |  | | | | | |  | | | | | 1 | | | | |  | | | | |  | | | | |  | | | | |  | | | | |  | | | | | 1 | | | | 1 | | | | 1 | | | | 1 | | | 1 | | | | 1 | | | | 1 | | | | 1 | | | 1 | | | | |  |  | | | | | | 1 | | | | | 1 | | | | 1 | | | | 1 | 1 | | | | 1 | | | | 1 | | | |
| **G** | | **900** | | | | | 1 | | | 1 | | | | 1 | | | | | | | | | | | | | | 1 | | | | | | | | | 1 | | | | | | | 1 | | | | | | | | 1 | | | | | | | |  | | | | | 1 | | | | | 1 | | | 1 | | | | | 1 | | | |  | | | | | 1 | | | | | 1 | | | | 1 | | | | | | 1 | | | | | 1 | | | | | 1 | | | | 1 | | | | | 1 | | | | | 1 | | | | | 1 | | | | | | 1 | | | |  | | | | | |  | | | | | 1 | | | | |  | | | | |  | | | | |  | | | | |  | | | | |  | | | | | 1 | | | | 1 | | | | 1 | | | | 1 | | | 1 | | | |  | | | | 1 | | | | 1 | | |  | | | | |  |  | | | | | | 1 | | | | | 1 | | | | 1 | | | | 1 | 1 | | | | 1 | | | | 1 | | | |
| **H** | | **1050** | | | | |  | | |  | | | |  | | | | | | | | | | | | | |  | | | | | | | | |  | | | | | | |  | | | | | | | |  | | | | | | | |  | | | | |  | | | | |  | | |  | | | | |  | | | | 1 | | | | |  | | | | |  | | | |  | | | | | |  | | | | |  | | | | |  | | | |  | | | | |  | | | | |  | | | | |  | | | | | |  | | | |  | | | | | |  | | | | |  | | | | |  | | | | |  | | | | |  | | | | |  | | | | |  | | | | |  | | | | 1 | | | | 1 | | | | 1 | | |  | | | |  | | | |  | | | |  | | |  | | | | |  |  | | | | | |  | | | | | 1 | | | | 1 | | | | 1 | 1 | | | | 1 | | | | 1 | | | |
| **I** | | **1100** | | | | |  | | |  | | | |  | | | | | | | | | | | | | |  | | | | | | | | |  | | | | | | |  | | | | | | | |  | | | | | | | |  | | | | |  | | | | |  | | |  | | | | |  | | | |  | | | | |  | | | | |  | | | |  | | | | | |  | | | | |  | | | | |  | | | |  | | | | |  | | | | |  | | | | | 1 | | | | | | 1 | | | |  | | | | | |  | | | | |  | | | | |  | | | | |  | | | | |  | | | | |  | | | | |  | | | | | 1 | | | |  | | | |  | | | |  | | |  | | | |  | | | |  | | | |  | | |  | | | | |  |  | | | | | | 1 | | | | | 1 | | | | 1 | | | | 1 | 1 | | | | 1 | | | | 1 | | | |
| **J** | | **1200** | | | | |  | | |  | | | |  | | | | | | | | | | | | | |  | | | | | | | | |  | | | | | | |  | | | | | | | |  | | | | | | | |  | | | | |  | | | | |  | | |  | | | | |  | | | | 1 | | | | |  | | | | |  | | | |  | | | | | | 1 | | | | |  | | | | | 1 | | | |  | | | | | 1 | | | | |  | | | | |  | | | | | |  | | | | 1 | | | | | |  | | | | | 1 | | | | | 1 | | | | | 1 | | | | | 1 | | | | | 1 | | | | | 1 | | | | | 1 | | | | 1 | | | | 1 | | | | 1 | | |  | | | |  | | | |  | | | |  | | | 1 | | | | | 1 | 1 | | | | | | 1 | | | | | 1 | | | | 1 | | | | 1 | 1 | | | | 1 | | | | 1 | | | |
| **K** | | **1400** | | | | |  | | |  | | | |  | | | | | | | | | | | | | |  | | | | | | | | |  | | | | | | |  | | | | | | | |  | | | | | | | |  | | | | | 1 | | | | | 1 | | | 1 | | | | | 1 | | | |  | | | | |  | | | | |  | | | |  | | | | | |  | | | | |  | | | | |  | | | |  | | | | | 1 | | | | | 1 | | | | | 1 | | | | | | 1 | | | |  | | | | | |  | | | | |  | | | | |  | | | | |  | | | | |  | | | | |  | | | | |  | | | | |  | | | | 1 | | | |  | | | |  | | |  | | | |  | | | |  | | | |  | | |  | | | | |  |  | | | | | |  | | | | |  | | | |  | | | |  |  | | | |  | | | |  | | | |
| **L** | | **1450** | | | | | 1 | | |  | | | | 1 | | | | | | | | | | | | | |  | | | | | | | | |  | | | | | | |  | | | | | | | | 1 | | | | | | | |  | | | | | 1 | | | | | 1 | | | 1 | | | | | 1 | | | |  | | | | |  | | | | |  | | | |  | | | | | |  | | | | |  | | | | |  | | | |  | | | | | 1 | | | | | 1 | | | | | 1 | | | | | | 1 | | | |  | | | | | |  | | | | |  | | | | |  | | | | |  | | | | |  | | | | |  | | | | |  | | | | |  | | | |  | | | |  | | | |  | | |  | | | |  | | | | 1 | | | | 1 | | |  | | | | |  |  | | | | | |  | | | | |  | | | |  | | | |  |  | | | |  | | | |  | | | |
|  | |  | | | | |  | | |  | | | |  | | | | | | | | | | | | | |  | | | | | | | | |  | | | | | | |  | | | | | | | |  | | | | | | | |  | | | | |  | | | | |  | | |  | | | | |  | | | |  | | | | |  | | | | |  | | | |  | | | | | |  | | | | |  | | | | |  | | | |  | | | | |  | | | | |  | | | | |  | | | | | |  | | | |  | | | | | |  | | | | |  | | | | |  | | | | |  | | | | |  | | | | |  | | | | |  | | | | |  | | | |  | | | |  | | | |  | | |  | | | |  | | | |  | | | |  | | |  | | | | |  |  | | | | | |  | | | | |  | | | |  | | | |  |  | | | |  | | | |  | | | |
| **UBC 811** | | | | | | |  | | |  | | | |  | | | | | | | | | | | | | |  | | | | | | | | |  | | | | | | |  | | | | | | | |  | | | | | | | |  | | | | |  | | | | |  | | |  | | | | |  | | | |  | | | | |  | | | | |  | | | |  | | | | | |  | | | | |  | | | | |  | | | |  | | | | |  | | | | |  | | | | |  | | | | | |  | | | |  | | | | | |  | | | | |  | | | | |  | | | | |  | | | | |  | | | | |  | | | | |  | | | | |  | | | |  | | | |  | | | |  | | |  | | | |  | | | |  | | | |  | | |  | | | | |  |  | | | | | |  | | | | |  | | | |  | | | |  |  | | | |  | | | |  | | | |
| **A** | | **250** | | | | | 1 | | |  | | | | 1 | | | | | | | | | | | | | | 1 | | | | | | | | | 1 | | | | | | | 1 | | | | | | | | 1 | | | | | | | | 1 | | | | | 1 | | | | | 1 | | | 1 | | | | | 1 | | | | 1 | | | | | 1 | | | | | 1 | | | |  | | | | | |  | | | | | 1 | | | | | 1 | | | | 1 | | | | | 1 | | | | | 1 | | | | |  | | | | | |  | | | |  | | | | | |  | | | | |  | | | | | 1 | | | | | 1 | | | | |  | | | | |  | | | | |  | | | | |  | | | |  | | | |  | | | |  | | |  | | | |  | | | |  | | | |  | | |  | | | | | 1 | 1 | | | | | |  | | | | |  | | | |  | | | |  |  | | | |  | | | |  | | | |
| **B** | | **350** | | | | | 1 | | |  | | | |  | | | | | | | | | | | | | | 1 | | | | | | | | | 1 | | | | | | | 1 | | | | | | | | 1 | | | | | | | | 1 | | | | | 1 | | | | | 1 | | | 1 | | | | | 1 | | | | 1 | | | | | 1 | | | | | 1 | | | | 1 | | | | | | 1 | | | | | 1 | | | | | 1 | | | | 1 | | | | | 1 | | | | | 1 | | | | | 1 | | | | | | 1 | | | | 1 | | | | | | 1 | | | | | 1 | | | | | 1 | | | | | 1 | | | | | 1 | | | | | 1 | | | | | 1 | | | | | 1 | | | | 1 | | | | 1 | | | |  | | | 1 | | | | 1 | | | | 1 | | | | 1 | | | 1 | | | | | 1 | 1 | | | | | | 1 | | | | | 1 | | | | 1 | | | | 1 | 1 | | | | 1 | | | | 1 | | | |
| **C** | | **600** | | | | | 1 | | |  | | | |  | | | | | | | | | | | | | |  | | | | | | | | | 1 | | | | | | | 1 | | | | | | | | 1 | | | | | | | | 1 | | | | |  | | | | | 1 | | | 1 | | | | | 1 | | | | 1 | | | | | 1 | | | | | 1 | | | | 1 | | | | | | 1 | | | | |  | | | | | 1 | | | | 1 | | | | | 1 | | | | | 1 | | | | | 1 | | | | | | 1 | | | | 1 | | | | | | 1 | | | | | 1 | | | | | 1 | | | | | 1 | | | | | 1 | | | | | 1 | | | | | 1 | | | | | 1 | | | | 1 | | | | 1 | | | | 1 | | | 1 | | | | 1 | | | | 1 | | | | 1 | | | 1 | | | | | 1 | 1 | | | | | | 1 | | | | | 1 | | | | 1 | | | | 1 | 1 | | | | 1 | | | | 1 | | | |
| **D** | | **700** | | | | | 1 | | |  | | | | 1 | | | | | | | | | | | | | | 1 | | | | | | | | | 1 | | | | | | | 1 | | | | | | | | 1 | | | | | | | | 1 | | | | | 1 | | | | | 1 | | | 1 | | | | | 1 | | | | 1 | | | | | 1 | | | | | 1 | | | | 1 | | | | | | 1 | | | | | 1 | | | | | 1 | | | | 1 | | | | | 1 | | | | | 1 | | | | | 1 | | | | | | 1 | | | | 1 | | | | | | 1 | | | | | 1 | | | | | 1 | | | | | 1 | | | | | 1 | | | | | 1 | | | | | 1 | | | | | 1 | | | | 1 | | | | 1 | | | |  | | | 1 | | | | 1 | | | | 1 | | | | 1 | | | 1 | | | | | 1 | 1 | | | | | | 1 | | | | | 1 | | | | 1 | | | | 1 | 1 | | | | 1 | | | | 1 | | | |
| **E** | | **800** | | | | |  | | | 1 | | | | 1 | | | | | | | | | | | | | |  | | | | | | | | |  | | | | | | |  | | | | | | | |  | | | | | | | |  | | | | | 1 | | | | |  | | |  | | | | |  | | | |  | | | | |  | | | | |  | | | |  | | | | | |  | | | | |  | | | | | 1 | | | | 1 | | | | | 1 | | | | | 1 | | | | |  | | | | | |  | | | |  | | | | | |  | | | | |  | | | | |  | | | | | 1 | | | | |  | | | | |  | | | | |  | | | | |  | | | |  | | | |  | | | | 1 | | |  | | | |  | | | |  | | | |  | | | 1 | | | | | 1 | 1 | | | | | | 1 | | | | | 1 | | | | 1 | | | | 1 | 1 | | | | 1 | | | | 1 | | | |
| **F** | | **900** | | | | |  | | |  | | | |  | | | | | | | | | | | | | |  | | | | | | | | |  | | | | | | |  | | | | | | | |  | | | | | | | |  | | | | | 1 | | | | |  | | |  | | | | |  | | | |  | | | | |  | | | | |  | | | |  | | | | | |  | | | | |  | | | | |  | | | |  | | | | |  | | | | |  | | | | |  | | | | | |  | | | |  | | | | | |  | | | | |  | | | | |  | | | | |  | | | | |  | | | | |  | | | | |  | | | | |  | | | |  | | | |  | | | |  | | | 1 | | | | 1 | | | | 1 | | | |  | | |  | | | | | 1 | 1 | | | | | | 1 | | | | | 1 | | | | 1 | | | | 1 | 1 | | | | 1 | | | | 1 | | | |
| **G** | | **1000** | | | | |  | | |  | | | |  | | | | | | | | | | | | | |  | | | | | | | | | 1 | | | | | | | 1 | | | | | | | | 1 | | | | | | | | 1 | | | | | 1 | | | | | 1 | | | 1 | | | | | 1 | | | | 1 | | | | | 1 | | | | | 1 | | | | 1 | | | | | |  | | | | | 1 | | | | | 1 | | | | 1 | | | | | 1 | | | | | 1 | | | | | 1 | | | | | | 1 | | | | 1 | | | | | | 1 | | | | | 1 | | | | | 1 | | | | | 1 | | | | | 1 | | | | | 1 | | | | | 1 | | | | | 1 | | | | 1 | | | | 1 | | | | 1 | | | 1 | | | | 1 | | | | 1 | | | |  | | | 1 | | | | | 1 | 1 | | | | | | 1 | | | | | 1 | | | | 1 | | | | 1 | 1 | | | | 1 | | | | 1 | | | |
| **H** | | **1050** | | | | |  | | |  | | | |  | | | | | | | | | | | | | |  | | | | | | | | |  | | | | | | |  | | | | | | | |  | | | | | | | |  | | | | |  | | | | |  | | |  | | | | |  | | | |  | | | | |  | | | | |  | | | |  | | | | | |  | | | | |  | | | | | 1 | | | | 1 | | | | | 1 | | | | | 1 | | | | | 1 | | | | | | 1 | | | | 1 | | | | | | 1 | | | | | 1 | | | | | 1 | | | | | 1 | | | | | 1 | | | | | 1 | | | | | 1 | | | | | 1 | | | | 1 | | | | 1 | | | |  | | | 1 | | | | 1 | | | | 1 | | | |  | | | 1 | | | | |  |  | | | | | | 1 | | | | | 1 | | | | 1 | | | | 1 | 1 | | | | 1 | | | | 1 | | | |
| **I** | | **1100** | | | | |  | | |  | | | |  | | | | | | | | | | | | | |  | | | | | | | | | 1 | | | | | | | 1 | | | | | | | | 1 | | | | | | | | 1 | | | | | 1 | | | | | 1 | | | 1 | | | | | 1 | | | | 1 | | | | | 1 | | | | | 1 | | | | 1 | | | | | |  | | | | | 1 | | | | | 1 | | | | 1 | | | | | 1 | | | | | 1 | | | | | 1 | | | | | | 1 | | | | 1 | | | | | | 1 | | | | | 1 | | | | | 1 | | | | | 1 | | | | | 1 | | | | | 1 | | | | | 1 | | | | | 1 | | | | 1 | | | | 1 | | | | 1 | | | 1 | | | | 1 | | | | 1 | | | |  | | | 1 | | | | | 1 | 1 | | | | | | 1 | | | | | 1 | | | | 1 | | | | 1 | 1 | | | | 1 | | | | 1 | | | |
| **J** | | **1200** | | | | |  | | |  | | | |  | | | | | | | | | | | | | | 1 | | | | | | | | | 1 | | | | | | | 1 | | | | | | | | 1 | | | | | | | | 1 | | | | | 1 | | | | | 1 | | | 1 | | | | | 1 | | | | 1 | | | | | 1 | | | | | 1 | | | | 1 | | | | | |  | | | | | 1 | | | | |  | | | |  | | | | |  | | | | |  | | | | |  | | | | | |  | | | |  | | | | | |  | | | | |  | | | | |  | | | | |  | | | | |  | | | | |  | | | | |  | | | | |  | | | |  | | | | 1 | | | | 1 | | |  | | | |  | | | |  | | | |  | | | 1 | | | | | 1 | 1 | | | | | | 1 | | | | | 1 | | | | 1 | | | | 1 | 1 | | | | 1 | | | | 1 | | | |
| **K** | | **1300** | | | | |  | | |  | | | |  | | | | | | | | | | | | | |  | | | | | | | | |  | | | | | | |  | | | | | | | |  | | | | | | | |  | | | | |  | | | | |  | | |  | | | | |  | | | |  | | | | |  | | | | |  | | | |  | | | | | |  | | | | |  | | | | |  | | | |  | | | | |  | | | | |  | | | | |  | | | | | |  | | | |  | | | | | |  | | | | |  | | | | |  | | | | |  | | | | |  | | | | |  | | | | |  | | | | |  | | | |  | | | | 1 | | | |  | | |  | | | |  | | | |  | | | |  | | |  | | | | |  | 1 | | | | | |  | | | | |  | | | |  | | | |  |  | | | |  | | | | 1 | | | |
|  | |  | | | | |  | | |  | | | |  | | | | | | | | | | | | | |  | | | | | | | | |  | | | | | | |  | | | | | | | |  | | | | | | | |  | | | | |  | | | | |  | | |  | | | | |  | | | |  | | | | |  | | | | |  | | | |  | | | | | |  | | | | |  | | | | |  | | | |  | | | | |  | | | | |  | | | | |  | | | | | |  | | | |  | | | | | |  | | | | |  | | | | |  | | | | |  | | | | |  | | | | |  | | | | |  | | | | |  | | | |  | | | |  | | | |  | | |  | | | |  | | | |  | | | |  | | |  | | | | |  |  | | | | | |  | | | | |  | | | |  | | | |  |  | | | |  | | | |  | | | |
| **UBC 813** | | | | | | |  | | |  | | | |  | | | | | | | | | | | | | |  | | | | | | | | |  | | | | | | |  | | | | | | | |  | | | | | | | |  | | | | |  | | | | |  | | |  | | | | |  | | | |  | | | | |  | | | | |  | | | |  | | | | | |  | | | | |  | | | | |  | | | |  | | | | |  | | | | |  | | | | |  | | | | | |  | | | |  | | | | | |  | | | | |  | | | | |  | | | | |  | | | | |  | | | | |  | | | | |  | | | | |  | | | |  | | | |  | | | |  | | |  | | | |  | | | |  | | | |  | | |  | | | | |  |  | | | | | |  | | | | |  | | | |  | | | |  |  | | | |  | | | |  | | | |
| **A** | | **400** | | | | |  | | | 1 | | | | 1 | | | | | | | | | | | | | | 1 | | | | | | | | | 1 | | | | | | | 1 | | | | | | | | 1 | | | | | | | | 1 | | | | | 1 | | | | | 1 | | | 1 | | | | | 1 | | | | 1 | | | | | 1 | | | | | 1 | | | | 1 | | | | | | 1 | | | | | 1 | | | | | 1 | | | | 1 | | | | |  | | | | | 1 | | | | | 1 | | | | | | 1 | | | | 1 | | | | | | 1 | | | | |  | | | | | 1 | | | | | 1 | | | | | 1 | | | | | 1 | | | | | 1 | | | | | 1 | | | |  | | | |  | | | | 1 | | | 1 | | | |  | | | | 1 | | | | 1 | | | 1 | | | | | 1 | 1 | | | | | | 1 | | | | | 1 | | | | 1 | | | | 1 | 1 | | | | 1 | | | | 1 | | | |
| **B** | | **1100** | | | | |  | | |  | | | | 1 | | | | | | | | | | | | | | 1 | | | | | | | | | 1 | | | | | | |  | | | | | | | |  | | | | | | | | 1 | | | | | 1 | | | | | 1 | | | 1 | | | | | 1 | | | | 1 | | | | | 1 | | | | | 1 | | | |  | | | | | |  | | | | |  | | | | |  | | | |  | | | | | 1 | | | | | 1 | | | | | 1 | | | | | | 1 | | | | 1 | | | | | |  | | | | | 1 | | | | | 1 | | | | | 1 | | | | | 1 | | | | | 1 | | | | | 1 | | | | | 1 | | | | 1 | | | | 1 | | | | 1 | | | 1 | | | |  | | | | 1 | | | | 1 | | | 1 | | | | | 1 | 1 | | | | | | 1 | | | | | 1 | | | | 1 | | | | 1 | 1 | | | | 1 | | | | 1 | | | |
| **C** | | **1200** | | | | |  | | |  | | | |  | | | | | | | | | | | | | |  | | | | | | | | | 1 | | | | | | | 1 | | | | | | | |  | | | | | | | | 1 | | | | | 1 | | | | | 1 | | | 1 | | | | | 1 | | | |  | | | | | 1 | | | | |  | | | |  | | | | | |  | | | | |  | | | | |  | | | |  | | | | | 1 | | | | | 1 | | | | | 1 | | | | | | 1 | | | |  | | | | | |  | | | | | 1 | | | | | 1 | | | | | 1 | | | | | 1 | | | | | 1 | | | | | 1 | | | | | 1 | | | | 1 | | | | 1 | | | | 1 | | |  | | | |  | | | | 1 | | | | 1 | | | 1 | | | | | 1 | 1 | | | | | | 1 | | | | | 1 | | | | 1 | | | | 1 | 1 | | | | 1 | | | | 1 | | | |
|  | |  | | | | |  | | |  | | | |  | | | | | | | | | | | | | |  | | | | | | | | |  | | | | | | |  | | | | | | | |  | | | | | | | |  | | | | |  | | | | |  | | |  | | | | |  | | | |  | | | | |  | | | | |  | | | |  | | | | | |  | | | | |  | | | | |  | | | |  | | | | |  | | | | |  | | | | |  | | | | | |  | | | |  | | | | | |  | | | | |  | | | | |  | | | | |  | | | | |  | | | | |  | | | | |  | | | | |  | | | |  | | | |  | | | |  | | |  | | | |  | | | |  | | | |  | | |  | | | | |  |  | | | | | |  | | | | |  | | | |  | | | |  |  | | | |  | | | |  | | | |
| **UBC 815** | | | | | | |  | | |  | | | |  | | | | | | | | | | | | | |  | | | | | | | | |  | | | | | | |  | | | | | | | |  | | | | | | | |  | | | | |  | | | | |  | | |  | | | | |  | | | |  | | | | |  | | | | |  | | | |  | | | | | |  | | | | |  | | | | |  | | | |  | | | | |  | | | | |  | | | | |  | | | | | |  | | | |  | | | | | |  | | | | |  | | | | |  | | | | |  | | | | |  | | | | |  | | | | |  | | | | |  | | | |  | | | |  | | | |  | | |  | | | |  | | | |  | | | |  | | |  | | | | |  |  | | | | | |  | | | | |  | | | |  | | | |  |  | | | |  | | | |  | | | |
| **A** | | **350** | | | | | 1 | | |  | | | | 1 | | | | | | | | | | | | | | 1 | | | | | | | | | 1 | | | | | | | 1 | | | | | | | | 1 | | | | | | | | 1 | | | | | 1 | | | | | 1 | | | 1 | | | | | 1 | | | | 1 | | | | | 1 | | | | | 1 | | | | 1 | | | | | | 1 | | | | | 1 | | | | | 1 | | | | 1 | | | | | 1 | | | | | 1 | | | | | 1 | | | | | | 1 | | | | 1 | | | | | |  | | | | | 1 | | | | | 1 | | | | | 1 | | | | | 1 | | | | | 1 | | | | | 1 | | | | | 1 | | | | 1 | | | | 1 | | | | 1 | | | 1 | | | | 1 | | | | 1 | | | | 1 | | | 1 | | | | | 1 | 1 | | | | | | 1 | | | | | 1 | | | | 1 | | | | 1 | 1 | | | | 1 | | | | 1 | | | |
| **B** | | **450** | | | | | 1 | | |  | | | | 1 | | | | | | | | | | | | | | 1 | | | | | | | | | 1 | | | | | | | 1 | | | | | | | | 1 | | | | | | | | 1 | | | | | 1 | | | | |  | | | 1 | | | | | 1 | | | | 1 | | | | | 1 | | | | | 1 | | | | 1 | | | | | |  | | | | | 1 | | | | | 1 | | | | 1 | | | | | 1 | | | | | 1 | | | | | 1 | | | | | | 1 | | | | 1 | | | | | |  | | | | | 1 | | | | | 1 | | | | | 1 | | | | | 1 | | | | | 1 | | | | | 1 | | | | | 1 | | | | 1 | | | | 1 | | | | 1 | | | 1 | | | | 1 | | | | 1 | | | |  | | | 1 | | | | | 1 | 1 | | | | | | 1 | | | | | 1 | | | | 1 | | | | 1 | 1 | | | | 1 | | | | 1 | | | |
| **C** | | **700** | | | | | 1 | | |  | | | | 1 | | | | | | | | | | | | | | 1 | | | | | | | | | 1 | | | | | | | 1 | | | | | | | | 1 | | | | | | | | 1 | | | | | 1 | | | | | 1 | | | 1 | | | | | 1 | | | | 1 | | | | | 1 | | | | |  | | | |  | | | | | | 1 | | | | | 1 | | | | | 1 | | | |  | | | | |  | | | | | 1 | | | | | 1 | | | | | | 1 | | | |  | | | | | | 1 | | | | | 1 | | | | | 1 | | | | |  | | | | |  | | | | | 1 | | | | |  | | | | |  | | | |  | | | | 1 | | | | 1 | | | 1 | | | | 1 | | | |  | | | | 1 | | | 1 | | | | | 1 | 1 | | | | | | 1 | | | | | 1 | | | | 1 | | | | 1 | 1 | | | | 1 | | | | 1 | | | |
| **D** | | **800** | | | | |  | | |  | | | |  | | | | | | | | | | | | | |  | | | | | | | | |  | | | | | | |  | | | | | | | |  | | | | | | | |  | | | | | 1 | | | | |  | | |  | | | | |  | | | |  | | | | |  | | | | |  | | | |  | | | | | |  | | | | |  | | | | |  | | | |  | | | | |  | | | | |  | | | | |  | | | | | |  | | | |  | | | | | |  | | | | |  | | | | |  | | | | |  | | | | |  | | | | |  | | | | |  | | | | |  | | | |  | | | |  | | | |  | | |  | | | |  | | | |  | | | |  | | |  | | | | |  |  | | | | | |  | | | | |  | | | |  | | | |  |  | | | |  | | | |  | | | |
| **E** | | **1000** | | | | |  | | |  | | | |  | | | | | | | | | | | | | |  | | | | | | | | |  | | | | | | |  | | | | | | | |  | | | | | | | |  | | | | |  | | | | |  | | |  | | | | |  | | | |  | | | | |  | | | | |  | | | |  | | | | | |  | | | | |  | | | | |  | | | |  | | | | |  | | | | |  | | | | |  | | | | | |  | | | |  | | | | | |  | | | | |  | | | | |  | | | | |  | | | | |  | | | | |  | | | | |  | | | | |  | | | |  | | | |  | | | |  | | |  | | | |  | | | | 1 | | | | 1 | | |  | | | | |  |  | | | | | |  | | | | |  | | | | 1 | | | | 1 | 1 | | | | 1 | | | | 1 | | | |
| **F** | | **1200** | | | | | 1 | | |  | | | | 1 | | | | | | | | | | | | | | 1 | | | | | | | | | 1 | | | | | | |  | | | | | | | | 1 | | | | | | | | 1 | | | | | 1 | | | | |  | | |  | | | | |  | | | |  | | | | | 1 | | | | |  | | | |  | | | | | | 1 | | | | |  | | | | |  | | | |  | | | | |  | | | | |  | | | | |  | | | | | |  | | | |  | | | | | |  | | | | | 1 | | | | | 1 | | | | |  | | | | |  | | | | |  | | | | |  | | | | |  | | | |  | | | |  | | | |  | | |  | | | |  | | | | 1 | | | | 1 | | |  | | | | |  |  | | | | | |  | | | | |  | | | | 1 | | | | 1 | 1 | | | | 1 | | | | 1 | | | |
|  | |  | | | | |  | | |  | | | |  | | | | | | | | | | | | | |  | | | | | | | | |  | | | | | | |  | | | | | | | |  | | | | | | | |  | | | | |  | | | | |  | | |  | | | | |  | | | |  | | | | |  | | | | |  | | | |  | | | | | |  | | | | |  | | | | |  | | | |  | | | | |  | | | | |  | | | | |  | | | | | |  | | | |  | | | | | |  | | | | |  | | | | |  | | | | |  | | | | |  | | | | |  | | | | |  | | | | |  | | | |  | | | |  | | | |  | | |  | | | |  | | | |  | | | |  | | |  | | | | |  |  | | | | | |  | | | | |  | | | |  | | | |  |  | | | |  | | | |  | | | |
| **UBC 817** | | | | | | |  | | |  | | | |  | | | | | | | | | | | | | |  | | | | | | | | |  | | | | | | |  | | | | | | | |  | | | | | | | |  | | | | |  | | | | |  | | |  | | | | |  | | | |  | | | | |  | | | | |  | | | |  | | | | | |  | | | | |  | | | | |  | | | |  | | | | |  | | | | |  | | | | |  | | | | | |  | | | |  | | | | | |  | | | | |  | | | | |  | | | | |  | | | | |  | | | | |  | | | | |  | | | | |  | | | |  | | | |  | | | |  | | |  | | | |  | | | |  | | | |  | | |  | | | | |  |  | | | | | |  | | | | |  | | | |  | | | |  |  | | | |  | | | |  | | | |
| **A** | | **1000** | | | | | 1 | | | 1 | | | | 1 | | | | | | | | | | | | | | 1 | | | | | | | | | 1 | | | | | | | 1 | | | | | | | | 1 | | | | | | | | 1 | | | | | 1 | | | | | 1 | | | 1 | | | | | 1 | | | | 1 | | | | | 1 | | | | | 1 | | | | 1 | | | | | | 1 | | | | | 1 | | | | | 1 | | | | 1 | | | | | 1 | | | | | 1 | | | | | 1 | | | | | | 1 | | | | 1 | | | | | | 1 | | | | | 1 | | | | | 1 | | | | | 1 | | | | | 1 | | | | | 1 | | | | | 1 | | | | | 1 | | | | 1 | | | | 1 | | | | 1 | | | 1 | | | |  | | | | 1 | | | | 1 | | | 1 | | | | | 1 | 1 | | | | | | 1 | | | | | 1 | | | | 1 | | | | 1 |  | | | | 1 | | | | 1 | | | |
| **B** | | **1200** | | | | | 1 | | | 1 | | | | 1 | | | | | | | | | | | | | | 1 | | | | | | | | | 1 | | | | | | | 1 | | | | | | | | 1 | | | | | | | | 1 | | | | | 1 | | | | | 1 | | | 1 | | | | | 1 | | | | 1 | | | | | 1 | | | | | 1 | | | | 1 | | | | | | 1 | | | | | 1 | | | | | 1 | | | | 1 | | | | | 1 | | | | | 1 | | | | | 1 | | | | | | 1 | | | | 1 | | | | | | 1 | | | | | 1 | | | | | 1 | | | | | 1 | | | | | 1 | | | | | 1 | | | | | 1 | | | | | 1 | | | | 1 | | | | 1 | | | | 1 | | | 1 | | | |  | | | | 1 | | | | 1 | | | 1 | | | | | 1 | 1 | | | | | | 1 | | | | | 1 | | | | 1 | | | | 1 |  | | | | 1 | | | | 1 | | | |
| **C** | | **1250** | | | | |  | | |  | | | |  | | | | | | | | | | | | | | 1 | | | | | | | | |  | | | | | | |  | | | | | | | |  | | | | | | | |  | | | | |  | | | | |  | | |  | | | | |  | | | |  | | | | |  | | | | |  | | | |  | | | | | |  | | | | |  | | | | |  | | | |  | | | | |  | | | | |  | | | | |  | | | | | |  | | | |  | | | | | |  | | | | |  | | | | |  | | | | |  | | | | |  | | | | |  | | | | |  | | | | |  | | | |  | | | |  | | | |  | | |  | | | |  | | | |  | | | |  | | |  | | | | |  |  | | | | | |  | | | | |  | | | |  | | | |  |  | | | |  | | | |  | | | |
|  | |  | | | | |  | | |  | | | |  | | | | | | | | | | | | | |  | | | | | | | | |  | | | | | | |  | | | | | | | |  | | | | | | | |  | | | | |  | | | | |  | | |  | | | | |  | | | |  | | | | |  | | | | |  | | | |  | | | | | |  | | | | |  | | | | |  | | | |  | | | | |  | | | | |  | | | | |  | | | | | |  | | | |  | | | | | |  | | | | |  | | | | |  | | | | |  | | | | |  | | | | |  | | | | |  | | | | |  | | | |  | | | |  | | | |  | | |  | | | |  | | | |  | | | |  | | |  | | | | |  |  | | | | | |  | | | | |  | | | |  | | | |  |  | | | |  | | | |  | | | |
| **UBC 818** | | | | | | |  | | |  | | | |  | | | | | | | | | | | | | |  | | | | | | | | |  | | | | | | |  | | | | | | | |  | | | | | | | |  | | | | |  | | | | |  | | |  | | | | |  | | | |  | | | | |  | | | | |  | | | |  | | | | | |  | | | | |  | | | | |  | | | |  | | | | |  | | | | |  | | | | |  | | | | | |  | | | |  | | | | | |  | | | | |  | | | | |  | | | | |  | | | | |  | | | | |  | | | | |  | | | | |  | | | |  | | | |  | | | |  | | |  | | | |  | | | |  | | | |  | | |  | | | | |  |  | | | | | |  | | | | |  | | | |  | | | |  |  | | | |  | | | |  | | | |
| **A** | | **400** | | | | | 1 | | | 1 | | | | 1 | | | | | | | | | | | | | | 1 | | | | | | | | | 1 | | | | | | | 1 | | | | | | | | 1 | | | | | | | | 1 | | | | | 1 | | | | | 1 | | | 1 | | | | | 1 | | | | 1 | | | | | 1 | | | | | 1 | | | | 1 | | | | | | 1 | | | | | 1 | | | | | 1 | | | | 1 | | | | | 1 | | | | | 1 | | | | | 1 | | | | | | 1 | | | | 1 | | | | | | 1 | | | | | 1 | | | | | 1 | | | | | 1 | | | | | 1 | | | | | 1 | | | | | 1 | | | | | 1 | | | | 1 | | | | 1 | | | | 1 | | | 1 | | | |  | | | | 1 | | | | 1 | | | 1 | | | | | 1 | 1 | | | | | | 1 | | | | | 1 | | | | 1 | | | | 1 | 1 | | | | 1 | | | | 1 | | | |
| **B** | | **1050** | | | | |  | | |  | | | | 1 | | | | | | | | | | | | | | 1 | | | | | | | | | 1 | | | | | | |  | | | | | | | | 1 | | | | | | | | 1 | | | | | 1 | | | | | 1 | | | 1 | | | | | 1 | | | | 1 | | | | | 1 | | | | | 1 | | | | 1 | | | | | |  | | | | | 1 | | | | | 1 | | | | 1 | | | | | 1 | | | | | 1 | | | | | 1 | | | | | | 1 | | | | 1 | | | | | | 1 | | | | | 1 | | | | | 1 | | | | | 1 | | | | | 1 | | | | | 1 | | | | | 1 | | | | | 1 | | | | 1 | | | | 1 | | | | 1 | | | 1 | | | |  | | | | 1 | | | | 1 | | | 1 | | | | | 1 | 1 | | | | | | 1 | | | | | 1 | | | | 1 | | | | 1 | 1 | | | | 1 | | | | 1 | | | |
| **C** | | **1200** | | | | |  | | |  | | | |  | | | | | | | | | | | | | | 1 | | | | | | | | | 1 | | | | | | |  | | | | | | | | 1 | | | | | | | | 1 | | | | | 1 | | | | | 1 | | | 1 | | | | | 1 | | | | 1 | | | | | 1 | | | | | 1 | | | | 1 | | | | | |  | | | | | 1 | | | | | 1 | | | | 1 | | | | | 1 | | | | | 1 | | | | | 1 | | | | | | 1 | | | | 1 | | | | | | 1 | | | | |  | | | | | 1 | | | | | 1 | | | | | 1 | | | | | 1 | | | | | 1 | | | | | 1 | | | | 1 | | | | 1 | | | | 1 | | | 1 | | | |  | | | | 1 | | | | 1 | | | 1 | | | | | 1 | 1 | | | | | | 1 | | | | | 1 | | | | 1 | | | | 1 | 1 | | | | 1 | | | | 1 | | | |
|  | |  | | | | |  | | |  | | | |  | | | | | | | | | | | | | |  | | | | | | | | |  | | | | | | |  | | | | | | | |  | | | | | | | |  | | | | |  | | | | |  | | |  | | | | |  | | | |  | | | | |  | | | | |  | | | |  | | | | | |  | | | | |  | | | | |  | | | |  | | | | |  | | | | |  | | | | |  | | | | | |  | | | |  | | | | | |  | | | | |  | | | | |  | | | | |  | | | | |  | | | | |  | | | | |  | | | | |  | | | |  | | | |  | | | |  | | |  | | | |  | | | |  | | | |  | | |  | | | | |  |  | | | | | |  | | | | |  | | | |  | | | |  |  | | | |  | | | |  | | | |
| **UBC 819** | | | | | | |  | | |  | | | |  | | | | | | | | | | | | | |  | | | | | | | | |  | | | | | | |  | | | | | | | |  | | | | | | | |  | | | | |  | | | | |  | | |  | | | | |  | | | |  | | | | |  | | | | |  | | | |  | | | | | |  | | | | |  | | | | |  | | | |  | | | | |  | | | | |  | | | | |  | | | | | |  | | | |  | | | | | |  | | | | |  | | | | |  | | | | |  | | | | |  | | | | |  | | | | |  | | | | |  | | | |  | | | |  | | | |  | | |  | | | |  | | | |  | | | |  | | |  | | | | |  |  | | | | | |  | | | | |  | | | |  | | | |  |  | | | |  | | | |  | | | |
| **A** | | **300** | | | | | 1 | | | 1 | | | | 1 | | | | | | | | | | | | | | 1 | | | | | | | | | 1 | | | | | | | 1 | | | | | | | | 1 | | | | | | | | 1 | | | | | 1 | | | | | 1 | | |  | | | | |  | | | |  | | | | |  | | | | |  | | | |  | | | | | |  | | | | |  | | | | |  | | | |  | | | | |  | | | | |  | | | | |  | | | | | |  | | | |  | | | | | |  | | | | |  | | | | |  | | | | |  | | | | |  | | | | |  | | | | |  | | | | |  | | | |  | | | |  | | | |  | | |  | | | |  | | | |  | | | |  | | |  | | | | |  |  | | | | | |  | | | | |  | | | |  | | | |  |  | | | |  | | | |  | | | |
| **B** | | **400** | | | | | 1 | | | 1 | | | | 1 | | | | | | | | | | | | | | 1 | | | | | | | | | 1 | | | | | | | 1 | | | | | | | | 1 | | | | | | | | 1 | | | | | 1 | | | | | 1 | | | 1 | | | | | 1 | | | | 1 | | | | | 1 | | | | |  | | | |  | | | | | |  | | | | |  | | | | |  | | | |  | | | | |  | | | | |  | | | | |  | | | | | |  | | | |  | | | | | |  | | | | |  | | | | |  | | | | |  | | | | |  | | | | |  | | | | |  | | | | |  | | | |  | | | |  | | | |  | | |  | | | |  | | | |  | | | |  | | |  | | | | |  |  | | | | | |  | | | | |  | | | |  | | | |  |  | | | |  | | | |  | | | |
| **C** | | **500** | | | | | 1 | | | 1 | | | | 1 | | | | | | | | | | | | | | 1 | | | | | | | | | 1 | | | | | | | 1 | | | | | | | | 1 | | | | | | | | 1 | | | | | 1 | | | | | 1 | | | 1 | | | | | 1 | | | | 1 | | | | | 1 | | | | |  | | | |  | | | | | |  | | | | |  | | | | |  | | | |  | | | | |  | | | | |  | | | | |  | | | | | |  | | | |  | | | | | |  | | | | |  | | | | |  | | | | |  | | | | |  | | | | |  | | | | |  | | | | |  | | | |  | | | |  | | | |  | | |  | | | |  | | | |  | | | |  | | |  | | | | |  |  | | | | | |  | | | | |  | | | |  | | | |  |  | | | |  | | | |  | | | |
| **D** | | **600** | | | | | 1 | | | 1 | | | | 1 | | | | | | | | | | | | | | 1 | | | | | | | | |  | | | | | | | 1 | | | | | | | | 1 | | | | | | | | 1 | | | | | 1 | | | | | 1 | | | 1 | | | | | 1 | | | | 1 | | | | | 1 | | | | | 1 | | | |  | | | | | |  | | | | |  | | | | |  | | | |  | | | | |  | | | | |  | | | | |  | | | | | | 1 | | | | 1 | | | | | |  | | | | | 1 | | | | |  | | | | |  | | | | |  | | | | |  | | | | |  | | | | | 1 | | | | 1 | | | | 1 | | | |  | | |  | | | | 1 | | | |  | | | |  | | | 1 | | | | | 1 | 1 | | | | | | 1 | | | | |  | | | | 1 | | | | 1 | 1 | | | | 1 | | | |  | | | |
| **E** | | **700** | | | | |  | | |  | | | |  | | | | | | | | | | | | | |  | | | | | | | | |  | | | | | | | 1 | | | | | | | | 1 | | | | | | | | 1 | | | | | 1 | | | | |  | | |  | | | | |  | | | |  | | | | |  | | | | | 1 | | | | 1 | | | | | | 1 | | | | | 1 | | | | | 1 | | | | 1 | | | | | 1 | | | | | 1 | | | | | 1 | | | | | | 1 | | | | 1 | | | | | | 1 | | | | | 1 | | | | | 1 | | | | | 1 | | | | | 1 | | | | | 1 | | | | | 1 | | | | | 1 | | | | 1 | | | | 1 | | | |  | | | 1 | | | | 1 | | | | 1 | | | | 1 | | | 1 | | | | | 1 | 1 | | | | | | 1 | | | | |  | | | | 1 | | | | 1 | 1 | | | | 1 | | | | 1 | | | |
| **F** | | **750** | | | | | 1 | | | 1 | | | | 1 | | | | | | | | | | | | | | 1 | | | | | | | | |  | | | | | | | 1 | | | | | | | | 1 | | | | | | | | 1 | | | | | 1 | | | | | 1 | | | 1 | | | | | 1 | | | | 1 | | | | | 1 | | | | | 1 | | | |  | | | | | |  | | | | |  | | | | |  | | | |  | | | | |  | | | | |  | | | | |  | | | | | |  | | | |  | | | | | |  | | | | |  | | | | |  | | | | |  | | | | |  | | | | |  | | | | |  | | | | |  | | | |  | | | |  | | | |  | | |  | | | |  | | | |  | | | |  | | |  | | | | |  |  | | | | | |  | | | | |  | | | |  | | | |  |  | | | |  | | | |  | | | |
| **G** | | **1000** | | | | | 1 | | | 1 | | | | 1 | | | | | | | | | | | | | | 1 | | | | | | | | | 1 | | | | | | | 1 | | | | | | | | 1 | | | | | | | | 1 | | | | | 1 | | | | |  | | | 1 | | | | | 1 | | | | 1 | | | | | 1 | | | | |  | | | | 1 | | | | | | 1 | | | | | 1 | | | | | 1 | | | | 1 | | | | | 1 | | | | | 1 | | | | | 1 | | | | | | 1 | | | | 1 | | | | | | 1 | | | | | 1 | | | | | 1 | | | | | 1 | | | | | 1 | | | | | 1 | | | | | 1 | | | | | 1 | | | | 1 | | | | 1 | | | |  | | |  | | | | 1 | | | | 1 | | | | 1 | | | 1 | | | | | 1 | 1 | | | | | | 1 | | | | |  | | | | 1 | | | | 1 | 1 | | | | 1 | | | | 1 | | | |
| **H** | | **1200** | | | | | 1 | | | 1 | | | | 1 | | | | | | | | | | | | | | 1 | | | | | | | | |  | | | | | | | 1 | | | | | | | | 1 | | | | | | | | 1 | | | | | 1 | | | | |  | | | 1 | | | | | 1 | | | | 1 | | | | | 1 | | | | |  | | | | 1 | | | | | | 1 | | | | | 1 | | | | | 1 | | | | 1 | | | | | 1 | | | | | 1 | | | | | 1 | | | | | | 1 | | | | 1 | | | | | | 1 | | | | | 1 | | | | | 1 | | | | | 1 | | | | | 1 | | | | | 1 | | | | | 1 | | | | | 1 | | | | 1 | | | | 1 | | | |  | | | 1 | | | | 1 | | | | 1 | | | | 1 | | | 1 | | | | | 1 | 1 | | | | | | 1 | | | | |  | | | | 1 | | | | 1 | 1 | | | | 1 | | | | 1 | | | |
|  | |  | | | | |  | | |  | | | |  | | | | | | | | | | | | | |  | | | | | | | | |  | | | | | | |  | | | | | | | |  | | | | | | | |  | | | | |  | | | | |  | | |  | | | | |  | | | |  | | | | |  | | | | |  | | | |  | | | | | |  | | | | |  | | | | |  | | | |  | | | | |  | | | | |  | | | | |  | | | | | |  | | | |  | | | | | |  | | | | |  | | | | |  | | | | |  | | | | |  | | | | |  | | | | |  | | | | |  | | | |  | | | |  | | | |  | | |  | | | |  | | | |  | | | |  | | |  | | | | |  |  | | | | | |  | | | | |  | | | |  | | | |  |  | | | |  | | | |  | | | |
| **UBC 820** | | | | | | |  | | |  | | | |  | | | | | | | | | | | | | |  | | | | | | | | |  | | | | | | |  | | | | | | | |  | | | | | | | |  | | | | |  | | | | |  | | |  | | | | |  | | | |  | | | | |  | | | | |  | | | |  | | | | | |  | | | | |  | | | | |  | | | |  | | | | |  | | | | |  | | | | |  | | | | | |  | | | |  | | | | | |  | | | | |  | | | | |  | | | | |  | | | | |  | | | | |  | | | | |  | | | | |  | | | |  | | | |  | | | |  | | |  | | | |  | | | |  | | | |  | | |  | | | | |  |  | | | | | |  | | | | |  | | | |  | | | |  |  | | | |  | | | |  | | | |
| **A** | | **400** | | | | | 1 | | | 1 | | | |  | | | | | | | | | | | | | |  | | | | | | | | |  | | | | | | |  | | | | | | | |  | | | | | | | |  | | | | |  | | | | |  | | |  | | | | |  | | | |  | | | | |  | | | | |  | | | |  | | | | | | 1 | | | | |  | | | | |  | | | |  | | | | |  | | | | |  | | | | |  | | | | | |  | | | |  | | | | | |  | | | | |  | | | | |  | | | | |  | | | | |  | | | | |  | | | | |  | | | | |  | | | |  | | | |  | | | |  | | |  | | | |  | | | |  | | | |  | | |  | | | | |  |  | | | | | |  | | | | |  | | | |  | | | |  |  | | | |  | | | |  | | | |
| **B** | | **600** | | | | | 1 | | | 1 | | | | 1 | | | | | | | | | | | | | | 1 | | | | | | | | | 1 | | | | | | | 1 | | | | | | | | 1 | | | | | | | | 1 | | | | | 1 | | | | | 1 | | | 1 | | | | | 1 | | | | 1 | | | | | 1 | | | | | 1 | | | | 1 | | | | | | 1 | | | | | 1 | | | | | 1 | | | | 1 | | | | | 1 | | | | | 1 | | | | | 1 | | | | | | 1 | | | | 1 | | | | | | 1 | | | | | 1 | | | | | 1 | | | | | 1 | | | | | 1 | | | | | 1 | | | | | 1 | | | | | 1 | | | | 1 | | | | 1 | | | | 1 | | | 1 | | | |  | | | | 1 | | | | 1 | | | 1 | | | | | 1 | 1 | | | | | | 1 | | | | | 1 | | | | 1 | | | | 1 | 1 | | | | 1 | | | | 1 | | | |
| **C** | | **700** | | | | |  | | | 1 | | | |  | | | | | | | | | | | | | |  | | | | | | | | |  | | | | | | | 1 | | | | | | | |  | | | | | | | | 1 | | | | |  | | | | |  | | |  | | | | | 1 | | | |  | | | | | 1 | | | | |  | | | | 1 | | | | | |  | | | | | 1 | | | | | 1 | | | | 1 | | | | | 1 | | | | |  | | | | | 1 | | | | | | 1 | | | |  | | | | | |  | | | | |  | | | | |  | | | | |  | | | | |  | | | | |  | | | | | 1 | | | | |  | | | |  | | | |  | | | |  | | | 1 | | | |  | | | |  | | | |  | | |  | | | | |  |  | | | | | |  | | | | |  | | | |  | | | |  |  | | | |  | | | |  | | | |
| **D** | | **800** | | | | | 1 | | | 1 | | | | 1 | | | | | | | | | | | | | | 1 | | | | | | | | | 1 | | | | | | | 1 | | | | | | | | 1 | | | | | | | | 1 | | | | | 1 | | | | |  | | |  | | | | | 1 | | | | 1 | | | | | 1 | | | | | 1 | | | | 1 | | | | | | 1 | | | | |  | | | | |  | | | | 1 | | | | |  | | | | | 1 | | | | |  | | | | | | 1 | | | | 1 | | | | | |  | | | | | 1 | | | | | 1 | | | | | 1 | | | | |  | | | | | 1 | | | | | 1 | | | | | 1 | | | | 1 | | | | 1 | | | | 1 | | | 1 | | | |  | | | | 1 | | | | 1 | | | 1 | | | | | 1 | 1 | | | | | | 1 | | | | | 1 | | | | 1 | | | | 1 | 1 | | | | 1 | | | | 1 | | | |
| **E** | | **1000** | | | | |  | | | 1 | | | |  | | | | | | | | | | | | | |  | | | | | | | | |  | | | | | | | 1 | | | | | | | |  | | | | | | | | 1 | | | | | 1 | | | | |  | | |  | | | | |  | | | |  | | | | |  | | | | | 1 | | | |  | | | | | |  | | | | |  | | | | | 1 | | | |  | | | | |  | | | | |  | | | | |  | | | | | |  | | | |  | | | | | |  | | | | | 1 | | | | | 1 | | | | | 1 | | | | |  | | | | | 1 | | | | |  | | | | | 1 | | | | 1 | | | |  | | | |  | | |  | | | |  | | | | 1 | | | | 1 | | | 1 | | | | |  | 1 | | | | | | 1 | | | | |  | | | | 1 | | | | 1 | 1 | | | | 1 | | | |  | | | |
| **F** | | **1100** | | | | | 1 | | |  | | | | 1 | | | | | | | | | | | | | | 1 | | | | | | | | | 1 | | | | | | | 1 | | | | | | | | 1 | | | | | | | | 1 | | | | |  | | | | | 1 | | | 1 | | | | | 1 | | | | 1 | | | | | 1 | | | | | 1 | | | | 1 | | | | | | 1 | | | | | 1 | | | | | 1 | | | | 1 | | | | | 1 | | | | | 1 | | | | | 1 | | | | | | 1 | | | | 1 | | | | | | 1 | | | | | 1 | | | | | 1 | | | | | 1 | | | | |  | | | | | 1 | | | | | 1 | | | | | 1 | | | | 1 | | | | 1 | | | | 1 | | | 1 | | | |  | | | | 1 | | | | 1 | | | 1 | | | | | 1 | 1 | | | | | | 1 | | | | | 1 | | | | 1 | | | | 1 | 1 | | | | 1 | | | | 1 | | | |
| **G** | | **1200** | | | | |  | | |  | | | | 1 | | | | | | | | | | | | | |  | | | | | | | | |  | | | | | | |  | | | | | | | |  | | | | | | | |  | | | | |  | | | | |  | | |  | | | | |  | | | |  | | | | |  | | | | |  | | | |  | | | | | |  | | | | |  | | | | |  | | | |  | | | | |  | | | | |  | | | | | 1 | | | | | |  | | | |  | | | | | |  | | | | | 1 | | | | | 1 | | | | | 1 | | | | |  | | | | |  | | | | |  | | | | | 1 | | | |  | | | | 1 | | | |  | | | 1 | | | |  | | | |  | | | | 1 | | | 1 | | | | |  | 1 | | | | | | 1 | | | | | 1 | | | | 1 | | | | 1 | 1 | | | | 1 | | | | 1 | | | |
|  | |  | | | | |  | | |  | | | |  | | | | | | | | | | | | | |  | | | | | | | | |  | | | | | | |  | | | | | | | |  | | | | | | | |  | | | | |  | | | | |  | | |  | | | | |  | | | |  | | | | |  | | | | |  | | | |  | | | | | |  | | | | |  | | | | |  | | | |  | | | | |  | | | | |  | | | | |  | | | | | |  | | | |  | | | | | |  | | | | |  | | | | |  | | | | |  | | | | |  | | | | |  | | | | |  | | | | |  | | | |  | | | |  | | | |  | | |  | | | |  | | | |  | | | |  | | |  | | | | |  |  | | | | | |  | | | | |  | | | |  | | | |  |  | | | |  | | | |  | | | |
| **UBC 822** | | | | | | |  | | |  | | | |  | | | | | | | | | | | | | |  | | | | | | | | |  | | | | | | |  | | | | | | | |  | | | | | | | |  | | | | |  | | | | |  | | |  | | | | |  | | | |  | | | | |  | | | | |  | | | |  | | | | | |  | | | | |  | | | | |  | | | |  | | | | |  | | | | |  | | | | |  | | | | | |  | | | |  | | | | | |  | | | | |  | | | | |  | | | | |  | | | | |  | | | | |  | | | | |  | | | | |  | | | |  | | | |  | | | |  | | |  | | | |  | | | |  | | | |  | | |  | | | | |  |  | | | | | |  | | | | |  | | | |  | | | |  |  | | | |  | | | |  | | | |
| **A** | | **300** | | | | | 1 | | |  | | | | 1 | | | | | | | | | | | | | | 1 | | | | | | | | | 1 | | | | | | | 1 | | | | | | | | 1 | | | | | | | |  | | | | | 1 | | | | | 1 | | | 1 | | | | | 1 | | | |  | | | | | 1 | | | | | 1 | | | |  | | | | | | 1 | | | | |  | | | | |  | | | | 1 | | | | | 1 | | | | | 1 | | | | | 1 | | | | | | 1 | | | | 1 | | | | | | 1 | | | | | 1 | | | | | 1 | | | | | 1 | | | | | 1 | | | | | 1 | | | | | 1 | | | | | 1 | | | | 1 | | | |  | | | | 1 | | |  | | | | 1 | | | | 1 | | | | 1 | | | 1 | | | | | 1 | 1 | | | | | | 1 | | | | | 1 | | | | 1 | | | | 1 | 1 | | | | 1 | | | | 1 | | | |
| **B** | | **600** | | | | | 1 | | |  | | | | 1 | | | | | | | | | | | | | | 1 | | | | | | | | | 1 | | | | | | | 1 | | | | | | | | 1 | | | | | | | |  | | | | | 1 | | | | | 1 | | | 1 | | | | | 1 | | | |  | | | | | 1 | | | | | 1 | | | |  | | | | | |  | | | | |  | | | | |  | | | | 1 | | | | | 1 | | | | | 1 | | | | | 1 | | | | | | 1 | | | | 1 | | | | | | 1 | | | | | 1 | | | | | 1 | | | | | 1 | | | | | 1 | | | | | 1 | | | | | 1 | | | | | 1 | | | | 1 | | | | 1 | | | | 1 | | |  | | | |  | | | | 1 | | | | 1 | | | 1 | | | | | 1 | 1 | | | | | | 1 | | | | | 1 | | | | 1 | | | | 1 | 1 | | | | 1 | | | | 1 | | | |
| **C** | | **650** | | | | | 1 | | |  | | | | 1 | | | | | | | | | | | | | | 1 | | | | | | | | | 1 | | | | | | | 1 | | | | | | | | 1 | | | | | | | |  | | | | | 1 | | | | | 1 | | | 1 | | | | | 1 | | | | 1 | | | | | 1 | | | | | 1 | | | | 1 | | | | | | 1 | | | | | 1 | | | | | 1 | | | | 1 | | | | | 1 | | | | | 1 | | | | | 1 | | | | | | 1 | | | | 1 | | | | | |  | | | | |  | | | | |  | | | | |  | | | | |  | | | | | 1 | | | | | 1 | | | | | 1 | | | | 1 | | | | 1 | | | | 1 | | |  | | | |  | | | | 1 | | | | 1 | | | 1 | | | | | 1 | 1 | | | | | |  | | | | | 1 | | | | 1 | | | | 1 | 1 | | | | 1 | | | | 1 | | | |
| **D** | | **750** | | | | | 1 | | |  | | | | 1 | | | | | | | | | | | | | | 1 | | | | | | | | | 1 | | | | | | | 1 | | | | | | | | 1 | | | | | | | |  | | | | | 1 | | | | | 1 | | | 1 | | | | | 1 | | | | 1 | | | | | 1 | | | | | 1 | | | | 1 | | | | | | 1 | | | | |  | | | | |  | | | | 1 | | | | | 1 | | | | | 1 | | | | | 1 | | | | | | 1 | | | | 1 | | | | | |  | | | | |  | | | | |  | | | | | 1 | | | | | 1 | | | | | 1 | | | | | 1 | | | | | 1 | | | | 1 | | | | 1 | | | | 1 | | | 1 | | | |  | | | | 1 | | | | 1 | | | 1 | | | | | 1 | 1 | | | | | | 1 | | | | | 1 | | | | 1 | | | | 1 | 1 | | | | 1 | | | | 1 | | | |
| **E** | | **850** | | | | | 1 | | |  | | | |  | | | | | | | | | | | | | |  | | | | | | | | | 1 | | | | | | |  | | | | | | | |  | | | | | | | |  | | | | | 1 | | | | | 1 | | | 1 | | | | | 1 | | | |  | | | | |  | | | | |  | | | |  | | | | | |  | | | | |  | | | | |  | | | | 1 | | | | | 1 | | | | | 1 | | | | | 1 | | | | | | 1 | | | | 1 | | | | | | 1 | | | | | 1 | | | | | 1 | | | | |  | | | | |  | | | | |  | | | | | 1 | | | | | 1 | | | |  | | | |  | | | | 1 | | |  | | | |  | | | |  | | | | 1 | | | 1 | | | | |  |  | | | | | | 1 | | | | |  | | | |  | | | |  |  | | | |  | | | | 1 | | | |
| **F** | | **1200** | | | | | 1 | | |  | | | | 1 | | | | | | | | | | | | | |  | | | | | | | | | 1 | | | | | | |  | | | | | | | | 1 | | | | | | | |  | | | | | 1 | | | | | 1 | | |  | | | | |  | | | |  | | | | |  | | | | |  | | | |  | | | | | |  | | | | |  | | | | |  | | | | 1 | | | | | 1 | | | | | 1 | | | | | 1 | | | | | | 1 | | | | 1 | | | | | |  | | | | |  | | | | |  | | | | | 1 | | | | | 1 | | | | | 1 | | | | |  | | | | | 1 | | | | 1 | | | |  | | | | 1 | | |  | | | |  | | | | 1 | | | | 1 | | | 1 | | | | | 1 | 1 | | | | | | 1 | | | | | 1 | | | | 1 | | | | 1 | 1 | | | | 1 | | | | 1 | | | |
|  | |  | | | | |  | | |  | | | |  | | | | | | | | | | | | | |  | | | | | | | | |  | | | | | | |  | | | | | | | |  | | | | | | | |  | | | | |  | | | | |  | | |  | | | | |  | | | |  | | | | |  | | | | |  | | | |  | | | | | |  | | | | |  | | | | |  | | | |  | | | | |  | | | | |  | | | | |  | | | | | |  | | | |  | | | | | |  | | | | |  | | | | |  | | | | |  | | | | |  | | | | |  | | | | |  | | | | |  | | | |  | | | |  | | | |  | | |  | | | |  | | | |  | | | |  | | |  | | | | |  |  | | | | | |  | | | | |  | | | |  | | | |  |  | | | |  | | | |  | | | |
| **UBC 824** | | | | | | |  | | |  | | | |  | | | | | | | | | | | | | |  | | | | | | | | |  | | | | | | |  | | | | | | | |  | | | | | | | |  | | | | |  | | | | |  | | |  | | | | |  | | | |  | | | | |  | | | | |  | | | |  | | | | | |  | | | | |  | | | | |  | | | |  | | | | |  | | | | |  | | | | |  | | | | | |  | | | |  | | | | | |  | | | | |  | | | | |  | | | | |  | | | | |  | | | | |  | | | | |  | | | | |  | | | |  | | | |  | | | |  | | |  | | | |  | | | |  | | | |  | | |  | | | | |  |  | | | | | |  | | | | |  | | | |  | | | |  |  | | | |  | | | |  | | | |
| **A** | | **250** | | | | | 1 | | |  | | | | 1 | | | | | | | | | | | | | | 1 | | | | | | | | | 1 | | | | | | | 1 | | | | | | | | 1 | | | | | | | |  | | | | | 1 | | | | | 1 | | |  | | | | |  | | | |  | | | | |  | | | | |  | | | |  | | | | | |  | | | | |  | | | | |  | | | |  | | | | |  | | | | |  | | | | |  | | | | | |  | | | |  | | | | | |  | | | | |  | | | | |  | | | | |  | | | | |  | | | | |  | | | | | 1 | | | | |  | | | |  | | | |  | | | |  | | | 1 | | | | 1 | | | | 1 | | | |  | | | 1 | | | | |  |  | | | | | |  | | | | |  | | | |  | | | |  |  | | | |  | | | |  | | | |
| **B** | | **300** | | | | | 1 | | |  | | | | 1 | | | | | | | | | | | | | | 1 | | | | | | | | | 1 | | | | | | | 1 | | | | | | | | 1 | | | | | | | |  | | | | | 1 | | | | | 1 | | | 1 | | | | | 1 | | | | 1 | | | | | 1 | | | | | 1 | | | |  | | | | | | 1 | | | | | 1 | | | | | 1 | | | |  | | | | |  | | | | |  | | | | |  | | | | | |  | | | |  | | | | | | 1 | | | | | 1 | | | | | 1 | | | | | 1 | | | | | 1 | | | | | 1 | | | | | 1 | | | | | 1 | | | | 1 | | | | 1 | | | | 1 | | | 1 | | | | 1 | | | | 1 | | | | 1 | | |  | | | | | 1 | 1 | | | | | |  | | | | |  | | | | 1 | | | |  |  | | | |  | | | |  | | | |
| **C** | | **350** | | | | |  | | |  | | | |  | | | | | | | | | | | | | |  | | | | | | | | |  | | | | | | |  | | | | | | | |  | | | | | | | |  | | | | | 1 | | | | | 1 | | | 1 | | | | | 1 | | | |  | | | | |  | | | | |  | | | |  | | | | | |  | | | | |  | | | | |  | | | |  | | | | |  | | | | |  | | | | |  | | | | | |  | | | |  | | | | | | 1 | | | | | 1 | | | | | 1 | | | | | 1 | | | | | 1 | | | | | 1 | | | | |  | | | | |  | | | |  | | | | 1 | | | | 1 | | |  | | | |  | | | |  | | | |  | | |  | | | | |  |  | | | | | |  | | | | |  | | | |  | | | |  |  | | | |  | | | |  | | | |
| **D** | | **450** | | | | | 1 | | |  | | | | 1 | | | | | | | | | | | | | | 1 | | | | | | | | | 1 | | | | | | | 1 | | | | | | | | 1 | | | | | | | |  | | | | | 1 | | | | | 1 | | | 1 | | | | | 1 | | | | 1 | | | | | 1 | | | | | 1 | | | | 1 | | | | | | 1 | | | | | 1 | | | | | 1 | | | | 1 | | | | | 1 | | | | | 1 | | | | |  | | | | | | 1 | | | |  | | | | | |  | | | | |  | | | | |  | | | | |  | | | | |  | | | | |  | | | | | 1 | | | | | 1 | | | | 1 | | | | 1 | | | | 1 | | | 1 | | | | 1 | | | | 1 | | | | 1 | | | 1 | | | | | 1 |  | | | | | | 1 | | | | | 1 | | | | 1 | | | | 1 |  | | | |  | | | |  | | | |
| **E** | | **500** | | | | | 1 | | |  | | | | 1 | | | | | | | | | | | | | | 1 | | | | | | | | | 1 | | | | | | | 1 | | | | | | | | 1 | | | | | | | |  | | | | | 1 | | | | | 1 | | | 1 | | | | | 1 | | | | 1 | | | | | 1 | | | | | 1 | | | | 1 | | | | | | 1 | | | | | 1 | | | | | 1 | | | | 1 | | | | | 1 | | | | | 1 | | | | | 1 | | | | | | 1 | | | | 1 | | | | | |  | | | | | 1 | | | | | 1 | | | | | 1 | | | | | 1 | | | | | 1 | | | | | 1 | | | | | 1 | | | | 1 | | | | 1 | | | | 1 | | | 1 | | | | 1 | | | | 1 | | | | 1 | | | 1 | | | | | 1 | 1 | | | | | | 1 | | | | | 1 | | | | 1 | | | | 1 | 1 | | | | 1 | | | | 1 | | | |
| **F** | | **550** | | | | | 1 | | |  | | | | 1 | | | | | | | | | | | | | |  | | | | | | | | |  | | | | | | |  | | | | | | | | 1 | | | | | | | |  | | | | | 1 | | | | | 1 | | | 1 | | | | | 1 | | | |  | | | | |  | | | | |  | | | |  | | | | | |  | | | | |  | | | | |  | | | |  | | | | |  | | | | |  | | | | | 1 | | | | | | 1 | | | | 1 | | | | | |  | | | | | 1 | | | | | 1 | | | | | 1 | | | | | 1 | | | | | 1 | | | | | 1 | | | | | 1 | | | | 1 | | | | 1 | | | | 1 | | | 1 | | | |  | | | | 1 | | | | 1 | | | 1 | | | | | 1 | 1 | | | | | |  | | | | | 1 | | | | 1 | | | | 1 | 1 | | | | 1 | | | | 1 | | | |
| **G** | | **600** | | | | |  | | |  | | | |  | | | | | | | | | | | | | | 1 | | | | | | | | | 1 | | | | | | | 1 | | | | | | | | 1 | | | | | | | |  | | | | | 1 | | | | | 1 | | | 1 | | | | | 1 | | | | 1 | | | | | 1 | | | | | 1 | | | | 1 | | | | | | 1 | | | | | 1 | | | | | 1 | | | | 1 | | | | | 1 | | | | | 1 | | | | | 1 | | | | | | 1 | | | |  | | | | | |  | | | | | 1 | | | | | 1 | | | | | 1 | | | | | 1 | | | | | 1 | | | | |  | | | | |  | | | | 1 | | | | 1 | | | | 1 | | |  | | | | 1 | | | | 1 | | | |  | | |  | | | | |  |  | | | | | | 1 | | | | | 1 | | | | 1 | | | | 1 | 1 | | | | 1 | | | | 1 | | | |
| **H** | | **650** | | | | |  | | |  | | | | 1 | | | | | | | | | | | | | |  | | | | | | | | |  | | | | | | |  | | | | | | | |  | | | | | | | |  | | | | |  | | | | |  | | | 1 | | | | | 1 | | | |  | | | | |  | | | | |  | | | |  | | | | | |  | | | | |  | | | | |  | | | |  | | | | |  | | | | |  | | | | |  | | | | | |  | | | | 1 | | | | | | 1 | | | | |  | | | | |  | | | | |  | | | | |  | | | | |  | | | | |  | | | | |  | | | |  | | | |  | | | |  | | |  | | | |  | | | |  | | | |  | | |  | | | | |  |  | | | | | |  | | | | |  | | | |  | | | | 1 |  | | | |  | | | |  | | | |
| **I** | | **700** | | | | |  | | |  | | | |  | | | | | | | | | | | | | |  | | | | | | | | |  | | | | | | |  | | | | | | | |  | | | | | | | |  | | | | |  | | | | |  | | | 1 | | | | | 1 | | | |  | | | | |  | | | | |  | | | |  | | | | | |  | | | | |  | | | | |  | | | |  | | | | | 1 | | | | | 1 | | | | | 1 | | | | | | 1 | | | |  | | | | | |  | | | | | 1 | | | | |  | | | | |  | | | | |  | | | | |  | | | | |  | | | | | 1 | | | |  | | | |  | | | |  | | |  | | | |  | | | |  | | | |  | | |  | | | | |  |  | | | | | |  | | | | | 1 | | | |  | | | |  |  | | | |  | | | |  | | | |
| **J** | | **750** | | | | | 1 | | |  | | | |  | | | | | | | | | | | | | |  | | | | | | | | | 1 | | | | | | |  | | | | | | | | 1 | | | | | | | |  | | | | | 1 | | | | | 1 | | | 1 | | | | | 1 | | | |  | | | | |  | | | | |  | | | |  | | | | | |  | | | | |  | | | | |  | | | | 1 | | | | |  | | | | |  | | | | |  | | | | | |  | | | |  | | | | | |  | | | | |  | | | | |  | | | | |  | | | | |  | | | | |  | | | | |  | | | | |  | | | | 1 | | | | 1 | | | | 1 | | | 1 | | | |  | | | | 1 | | | | 1 | | | 1 | | | | | 1 | 1 | | | | | |  | | | | |  | | | | 1 | | | | 1 | 1 | | | | 1 | | | | 1 | | | |
| **K** | | **850** | | | | |  | | |  | | | |  | | | | | | | | | | | | | |  | | | | | | | | |  | | | | | | |  | | | | | | | |  | | | | | | | |  | | | | | 1 | | | | | 1 | | |  | | | | |  | | | |  | | | | |  | | | | |  | | | |  | | | | | |  | | | | |  | | | | |  | | | |  | | | | | 1 | | | | | 1 | | | | | 1 | | | | | | 1 | | | |  | | | | | |  | | | | |  | | | | |  | | | | |  | | | | |  | | | | |  | | | | |  | | | | |  | | | |  | | | |  | | | |  | | |  | | | |  | | | |  | | | | 1 | | |  | | | | |  |  | | | | | |  | | | | | 1 | | | |  | | | |  | 1 | | | | 1 | | | | 1 | | | |
| **L** | | **900** | | | | |  | | |  | | | |  | | | | | | | | | | | | | |  | | | | | | | | |  | | | | | | |  | | | | | | | |  | | | | | | | |  | | | | | 1 | | | | | 1 | | |  | | | | |  | | | |  | | | | |  | | | | |  | | | |  | | | | | |  | | | | |  | | | | |  | | | |  | | | | | 1 | | | | | 1 | | | | |  | | | | | |  | | | |  | | | | | |  | | | | |  | | | | |  | | | | |  | | | | |  | | | | |  | | | | |  | | | | |  | | | |  | | | |  | | | |  | | |  | | | |  | | | |  | | | |  | | |  | | | | |  |  | | | | | |  | | | | |  | | | | 1 | | | |  |  | | | | 1 | | | | 1 | | | |
| **M** | | **1000** | | | | |  | | |  | | | |  | | | | | | | | | | | | | |  | | | | | | | | |  | | | | | | |  | | | | | | | |  | | | | | | | |  | | | | |  | | | | |  | | | 1 | | | | | 1 | | | |  | | | | |  | | | | |  | | | |  | | | | | |  | | | | |  | | | | |  | | | |  | | | | | 1 | | | | | 1 | | | | | 1 | | | | | |  | | | |  | | | | | |  | | | | |  | | | | |  | | | | |  | | | | |  | | | | |  | | | | |  | | | | |  | | | |  | | | | 1 | | | | 1 | | |  | | | |  | | | |  | | | |  | | |  | | | | |  |  | | | | | |  | | | | |  | | | | 1 | | | | 1 | 1 | | | | 1 | | | | 1 | | | |
| **N** | | **1050** | | | | |  | | |  | | | |  | | | | | | | | | | | | | |  | | | | | | | | |  | | | | | | |  | | | | | | | |  | | | | | | | |  | | | | | 1 | | | | | 1 | | | 1 | | | | | 1 | | | |  | | | | |  | | | | |  | | | |  | | | | | |  | | | | |  | | | | |  | | | |  | | | | |  | | | | |  | | | | | 1 | | | | | | 1 | | | |  | | | | | |  | | | | |  | | | | |  | | | | |  | | | | |  | | | | |  | | | | |  | | | | | 1 | | | | 1 | | | | 1 | | | | 1 | | |  | | | |  | | | |  | | | |  | | |  | | | | |  |  | | | | | |  | | | | |  | | | | 1 | | | | 1 | 1 | | | | 1 | | | | 1 | | | |
| **O** | | **1100** | | | | |  | | |  | | | |  | | | | | | | | | | | | | |  | | | | | | | | |  | | | | | | |  | | | | | | | |  | | | | | | | |  | | | | | 1 | | | | | 1 | | | 1 | | | | | 1 | | | |  | | | | |  | | | | |  | | | |  | | | | | |  | | | | |  | | | | |  | | | |  | | | | | 1 | | | | | 1 | | | | | 1 | | | | | | 1 | | | |  | | | | | |  | | | | |  | | | | |  | | | | |  | | | | |  | | | | |  | | | | |  | | | | | 1 | | | | 1 | | | | 1 | | | | 1 | | |  | | | |  | | | |  | | | |  | | |  | | | | |  |  | | | | | |  | | | | |  | | | | 1 | | | | 1 | 1 | | | | 1 | | | | 1 | | | |
| **P** | | **1200** | | | | | 1 | | |  | | | | 1 | | | | | | | | | | | | | | 1 | | | | | | | | | 1 | | | | | | | 1 | | | | | | | | 1 | | | | | | | | 1 | | | | | 1 | | | | | 1 | | | 1 | | | | | 1 | | | | 1 | | | | | 1 | | | | | 1 | | | | 1 | | | | | | 1 | | | | | 1 | | | | | 1 | | | | 1 | | | | | 1 | | | | | 1 | | | | | 1 | | | | | | 1 | | | | 1 | | | | | | 1 | | | | | 1 | | | | | 1 | | | | | 1 | | | | | 1 | | | | | 1 | | | | | 1 | | | | | 1 | | | | 1 | | | | 1 | | | | 1 | | | 1 | | | | 1 | | | | 1 | | | | 1 | | | 1 | | | | | 1 | 1 | | | | | | 1 | | | | | 1 | | | | 1 | | | | 1 | 1 | | | | 1 | | | | 1 | | | |
|  | |  | | | | |  | | |  | | | |  | | | | | | | | | | | | | |  | | | | | | | | |  | | | | | | |  | | | | | | | |  | | | | | | | |  | | | | |  | | | | |  | | |  | | | | |  | | | |  | | | | |  | | | | |  | | | |  | | | | | |  | | | | |  | | | | |  | | | |  | | | | |  | | | | |  | | | | |  | | | | | |  | | | |  | | | | | |  | | | | |  | | | | |  | | | | |  | | | | |  | | | | |  | | | | |  | | | | |  | | | |  | | | |  | | | |  | | |  | | | |  | | | |  | | | |  | | |  | | | | |  |  | | | | | |  | | | | |  | | | |  | | | |  |  | | | |  | | | |  | | | |
| **UBC 825** | | | | | | |  | | |  | | | |  | | | | | | | | | | | | | |  | | | | | | | | |  | | | | | | |  | | | | | | | |  | | | | | | | |  | | | | |  | | | | |  | | |  | | | | |  | | | |  | | | | |  | | | | |  | | | |  | | | | | |  | | | | |  | | | | |  | | | |  | | | | |  | | | | |  | | | | |  | | | | | |  | | | |  | | | | | |  | | | | |  | | | | |  | | | | |  | | | | |  | | | | |  | | | | |  | | | | |  | | | |  | | | |  | | | |  | | |  | | | |  | | | |  | | | |  | | |  | | | | |  |  | | | | | |  | | | | |  | | | |  | | | |  |  | | | |  | | | |  | | | |
| **A** | | **700** | | | | | 1 | | | 1 | | | | 1 | | | | | | | | | | | | | | 1 | | | | | | | | | 1 | | | | | | | 1 | | | | | | | | 1 | | | | | | | | 1 | | | | | 1 | | | | | 1 | | | 1 | | | | | 1 | | | | 1 | | | | | 1 | | | | | 1 | | | | 1 | | | | | | 1 | | | | | 1 | | | | | 1 | | | | 1 | | | | | 1 | | | | | 1 | | | | | 1 | | | | | | 1 | | | | 1 | | | | | | 1 | | | | | 1 | | | | | 1 | | | | | 1 | | | | | 1 | | | | | 1 | | | | | 1 | | | | | 1 | | | | 1 | | | | 1 | | | | 1 | | | 1 | | | | 1 | | | | 1 | | | | 1 | | | 1 | | | | | 1 | 1 | | | | | | 1 | | | | | 1 | | | | 1 | | | | 1 | 1 | | | | 1 | | | | 1 | | | |
| **B** | | **850** | | | | | 1 | | | 1 | | | | 1 | | | | | | | | | | | | | | 1 | | | | | | | | | 1 | | | | | | | 1 | | | | | | | | 1 | | | | | | | | 1 | | | | | 1 | | | | | 1 | | | 1 | | | | | 1 | | | | 1 | | | | | 1 | | | | | 1 | | | | 1 | | | | | | 1 | | | | |  | | | | | 1 | | | | 1 | | | | | 1 | | | | | 1 | | | | | 1 | | | | | | 1 | | | | 1 | | | | | | 1 | | | | | 1 | | | | | 1 | | | | | 1 | | | | | 1 | | | | | 1 | | | | | 1 | | | | | 1 | | | | 1 | | | | 1 | | | | 1 | | | 1 | | | | 1 | | | | 1 | | | | 1 | | | 1 | | | | | 1 | 1 | | | | | | 1 | | | | | 1 | | | | 1 | | | | 1 | 1 | | | | 1 | | | | 1 | | | |
| **C** | | **1000** | | | | | 1 | | |  | | | | 1 | | | | | | | | | | | | | |  | | | | | | | | |  | | | | | | | 1 | | | | | | | | 1 | | | | | | | | 1 | | | | | 1 | | | | | 1 | | | 1 | | | | | 1 | | | | 1 | | | | | 1 | | | | | 1 | | | |  | | | | | | 1 | | | | |  | | | | | 1 | | | | 1 | | | | | 1 | | | | | 1 | | | | | 1 | | | | | | 1 | | | | 1 | | | | | | 1 | | | | | 1 | | | | | 1 | | | | | 1 | | | | | 1 | | | | | 1 | | | | | 1 | | | | | 1 | | | | 1 | | | | 1 | | | | 1 | | | 1 | | | | 1 | | | | 1 | | | | 1 | | | 1 | | | | | 1 | 1 | | | | | | 1 | | | | | 1 | | | | 1 | | | | 1 | 1 | | | | 1 | | | | 1 | | | |
| **D** | | **1100** | | | | | 1 | | |  | | | | 1 | | | | | | | | | | | | | |  | | | | | | | | |  | | | | | | | 1 | | | | | | | | 1 | | | | | | | | 1 | | | | | 1 | | | | | 1 | | | 1 | | | | | 1 | | | | 1 | | | | | 1 | | | | | 1 | | | |  | | | | | | 1 | | | | |  | | | | | 1 | | | | 1 | | | | | 1 | | | | | 1 | | | | | 1 | | | | | | 1 | | | | 1 | | | | | | 1 | | | | | 1 | | | | | 1 | | | | | 1 | | | | | 1 | | | | | 1 | | | | | 1 | | | | | 1 | | | | 1 | | | | 1 | | | | 1 | | | 1 | | | |  | | | | 1 | | | | 1 | | | 1 | | | | | 1 | 1 | | | | | | 1 | | | | | 1 | | | | 1 | | | | 1 | 1 | | | | 1 | | | | 1 | | | |
| **E** | | **1150** | | | | | 1 | | |  | | | | 1 | | | | | | | | | | | | | |  | | | | | | | | |  | | | | | | |  | | | | | | | | 1 | | | | | | | | 1 | | | | | 1 | | | | | 1 | | | 1 | | | | | 1 | | | | 1 | | | | | 1 | | | | | 1 | | | |  | | | | | | 1 | | | | |  | | | | | 1 | | | | 1 | | | | | 1 | | | | | 1 | | | | | 1 | | | | | | 1 | | | | 1 | | | | | |  | | | | | 1 | | | | | 1 | | | | | 1 | | | | | 1 | | | | | 1 | | | | | 1 | | | | | 1 | | | | 1 | | | | 1 | | | | 1 | | | 1 | | | |  | | | | 1 | | | | 1 | | | 1 | | | | | 1 | 1 | | | | | | 1 | | | | | 1 | | | | 1 | | | | 1 | 1 | | | | 1 | | | | 1 | | | |
| **F** | | **1250** | | | | |  | | |  | | | | 1 | | | | | | | | | | | | | |  | | | | | | | | |  | | | | | | |  | | | | | | | |  | | | | | | | |  | | | | |  | | | | |  | | |  | | | | |  | | | |  | | | | |  | | | | |  | | | |  | | | | | |  | | | | |  | | | | |  | | | |  | | | | |  | | | | |  | | | | |  | | | | | | 1 | | | |  | | | | | |  | | | | |  | | | | |  | | | | |  | | | | |  | | | | |  | | | | |  | | | | | 1 | | | | 1 | | | |  | | | | 1 | | |  | | | |  | | | |  | | | |  | | |  | | | | |  |  | | | | | |  | | | | |  | | | |  | | | |  |  | | | |  | | | |  | | | |
|  | |  | | | | |  | | |  | | | |  | | | | | | | | | | | | | |  | | | | | | | | |  | | | | | | |  | | | | | | | |  | | | | | | | |  | | | | |  | | | | |  | | |  | | | | |  | | | |  | | | | |  | | | | |  | | | |  | | | | | |  | | | | |  | | | | |  | | | |  | | | | |  | | | | |  | | | | |  | | | | | |  | | | |  | | | | | |  | | | | |  | | | | |  | | | | |  | | | | |  | | | | |  | | | | |  | | | | |  | | | |  | | | |  | | | |  | | |  | | | |  | | | |  | | | |  | | |  | | | | |  |  | | | | | |  | | | | |  | | | |  | | | |  |  | | | |  | | | |  | | | |
| **UBC 826** | | | | | | |  | | |  | | | |  | | | | | | | | | | | | | |  | | | | | | | | |  | | | | | | |  | | | | | | | |  | | | | | | | |  | | | | |  | | | | |  | | |  | | | | |  | | | |  | | | | |  | | | | |  | | | |  | | | | | |  | | | | |  | | | | |  | | | |  | | | | |  | | | | |  | | | | |  | | | | | |  | | | |  | | | | | |  | | | | |  | | | | |  | | | | |  | | | | |  | | | | |  | | | | |  | | | | |  | | | |  | | | |  | | | |  | | |  | | | |  | | | |  | | | |  | | |  | | | | |  |  | | | | | |  | | | | |  | | | |  | | | |  |  | | | |  | | | |  | | | |
| **A** | | **750** | | | | |  | | |  | | | |  | | | | | | | | | | | | | |  | | | | | | | | |  | | | | | | | 1 | | | | | | | | 1 | | | | | | | |  | | | | |  | | | | |  | | |  | | | | |  | | | |  | | | | |  | | | | |  | | | |  | | | | | |  | | | | | 1 | | | | |  | | | | 1 | | | | | 1 | | | | | 1 | | | | |  | | | | | |  | | | |  | | | | | |  | | | | |  | | | | |  | | | | |  | | | | |  | | | | |  | | | | | 1 | | | | |  | | | |  | | | |  | | | |  | | |  | | | | 1 | | | | 1 | | | |  | | |  | | | | |  |  | | | | | |  | | | | |  | | | |  | | | |  |  | | | |  | | | |  | | | |
| **B** | | **900** | | | | | 1 | | |  | | | |  | | | | | | | | | | | | | | 1 | | | | | | | | | 1 | | | | | | |  | | | | | | | | 1 | | | | | | | | 1 | | | | |  | | | | |  | | |  | | | | |  | | | |  | | | | |  | | | | |  | | | |  | | | | | | 1 | | | | | 1 | | | | |  | | | |  | | | | | 1 | | | | | 1 | | | | | 1 | | | | | | 1 | | | | 1 | | | | | | 1 | | | | | 1 | | | | | 1 | | | | | 1 | | | | | 1 | | | | | 1 | | | | | 1 | | | | | 1 | | | | 1 | | | | 1 | | | | 1 | | | 1 | | | |  | | | | 1 | | | | 1 | | | 1 | | | | | 1 | 1 | | | | | | 1 | | | | | 1 | | | | 1 | | | | 1 | 1 | | | | 1 | | | | 1 | | | |
| **C** | | **1000** | | | | | 1 | | |  | | | | 1 | | | | | | | | | | | | | | 1 | | | | | | | | | 1 | | | | | | | 1 | | | | | | | | 1 | | | | | | | | 1 | | | | | 1 | | | | | 1 | | | 1 | | | | | 1 | | | | 1 | | | | | 1 | | | | | 1 | | | | 1 | | | | | | 1 | | | | | 1 | | | | | 1 | | | | 1 | | | | |  | | | | | 1 | | | | |  | | | | | |  | | | |  | | | | | |  | | | | |  | | | | |  | | | | |  | | | | |  | | | | |  | | | | | 1 | | | | |  | | | |  | | | |  | | | | 1 | | | 1 | | | | 1 | | | | 1 | | | |  | | |  | | | | |  |  | | | | | |  | | | | |  | | | |  | | | |  |  | | | |  | | | |  | | | |
| **D** | | **1100** | | | | |  | | |  | | | |  | | | | | | | | | | | | | |  | | | | | | | | |  | | | | | | |  | | | | | | | |  | | | | | | | |  | | | | |  | | | | |  | | |  | | | | |  | | | |  | | | | |  | | | | |  | | | |  | | | | | |  | | | | |  | | | | |  | | | |  | | | | |  | | | | |  | | | | |  | | | | | |  | | | |  | | | | | |  | | | | |  | | | | |  | | | | |  | | | | |  | | | | |  | | | | |  | | | | |  | | | |  | | | |  | | | |  | | |  | | | |  | | | |  | | | |  | | |  | | | | |  |  | | | | | |  | | | | |  | | | |  | | | |  |  | | | |  | | | |  | | | |
| **E** | | **1200** | | | | | 1 | | |  | | | | 1 | | | | | | | | | | | | | | 1 | | | | | | | | | 1 | | | | | | |  | | | | | | | | 1 | | | | | | | | 1 | | | | | 1 | | | | |  | | | 1 | | | | | 1 | | | | 1 | | | | | 1 | | | | | 1 | | | | 1 | | | | | | 1 | | | | | 1 | | | | | 1 | | | |  | | | | | 1 | | | | |  | | | | | 1 | | | | | | 1 | | | | 1 | | | | | |  | | | | | 1 | | | | | 1 | | | | | 1 | | | | | 1 | | | | | 1 | | | | | 1 | | | | | 1 | | | | 1 | | | | 1 | | | | 1 | | | 1 | | | |  | | | |  | | | | 1 | | | 1 | | | | | 1 | 1 | | | | | | 1 | | | | | 1 | | | | 1 | | | | 1 | 1 | | | | 1 | | | | 1 | | | |
| **F** | | **1500** | | | | | 1 | | |  | | | | 1 | | | | | | | | | | | | | | 1 | | | | | | | | | 1 | | | | | | | 1 | | | | | | | | 1 | | | | | | | | 1 | | | | | 1 | | | | |  | | | 1 | | | | | 1 | | | | 1 | | | | | 1 | | | | | 1 | | | | 1 | | | | | | 1 | | | | | 1 | | | | | 1 | | | | 1 | | | | | 1 | | | | | 1 | | | | | 1 | | | | | | 1 | | | | 1 | | | | | |  | | | | | 1 | | | | | 1 | | | | | 1 | | | | | 1 | | | | | 1 | | | | | 1 | | | | | 1 | | | | 1 | | | | 1 | | | | 1 | | | 1 | | | | 1 | | | | 1 | | | | 1 | | | 1 | | | | | 1 | 1 | | | | | | 1 | | | | | 1 | | | | 1 | | | | 1 | 1 | | | | 1 | | | | 1 | | | |
|  | |  | | | | |  | | |  | | | |  | | | | | | | | | | | | | |  | | | | | | | | |  | | | | | | |  | | | | | | | |  | | | | | | | |  | | | | |  | | | | |  | | |  | | | | |  | | | |  | | | | |  | | | | |  | | | |  | | | | | |  | | | | |  | | | | |  | | | |  | | | | |  | | | | |  | | | | |  | | | | | |  | | | |  | | | | | |  | | | | |  | | | | |  | | | | |  | | | | |  | | | | |  | | | | |  | | | | |  | | | |  | | | |  | | | |  | | |  | | | |  | | | |  | | | |  | | |  | | | | |  |  | | | | | |  | | | | |  | | | |  | | | |  |  | | | |  | | | |  | | | |
| **UBC 827** | | | | | | |  | | |  | | | |  | | | | | | | | | | | | | |  | | | | | | | | |  | | | | | | |  | | | | | | | |  | | | | | | | |  | | | | |  | | | | |  | | |  | | | | |  | | | |  | | | | |  | | | | |  | | | |  | | | | | |  | | | | |  | | | | |  | | | |  | | | | |  | | | | |  | | | | |  | | | | | |  | | | |  | | | | | |  | | | | |  | | | | |  | | | | |  | | | | |  | | | | |  | | | | |  | | | | |  | | | |  | | | |  | | | |  | | |  | | | |  | | | |  | | | |  | | |  | | | | |  |  | | | | | |  | | | | |  | | | |  | | | |  |  | | | |  | | | |  | | | |
| **A** | | **600** | | | | |  | | |  | | | |  | | | | | | | | | | | | | |  | | | | | | | | |  | | | | | | |  | | | | | | | |  | | | | | | | |  | | | | |  | | | | | 1 | | | 1 | | | | |  | | | |  | | | | |  | | | | |  | | | |  | | | | | |  | | | | |  | | | | |  | | | |  | | | | |  | | | | |  | | | | | 1 | | | | | |  | | | |  | | | | | |  | | | | |  | | | | |  | | | | |  | | | | |  | | | | |  | | | | |  | | | | |  | | | |  | | | |  | | | |  | | | 1 | | | |  | | | |  | | | |  | | |  | | | | |  |  | | | | | |  | | | | |  | | | |  | | | |  |  | | | |  | | | |  | | | |
| **B** | | **700** | | | | | 1 | | |  | | | | 1 | | | | | | | | | | | | | | 1 | | | | | | | | |  | | | | | | | 1 | | | | | | | |  | | | | | | | |  | | | | | 1 | | | | |  | | |  | | | | | 1 | | | | 1 | | | | | 1 | | | | |  | | | | 1 | | | | | | 1 | | | | | 1 | | | | | 1 | | | |  | | | | |  | | | | |  | | | | | 1 | | | | | |  | | | | 1 | | | | | |  | | | | |  | | | | |  | | | | |  | | | | | 1 | | | | | 1 | | | | | 1 | | | | | 1 | | | | 1 | | | | 1 | | | | 1 | | | 1 | | | | 1 | | | | 1 | | | | 1 | | | 1 | | | | | 1 | 1 | | | | | | 1 | | | | | 1 | | | | 1 | | | |  |  | | | |  | | | | 1 | | | |
| **C** | | **800** | | | | | 1 | | |  | | | | 1 | | | | | | | | | | | | | | 1 | | | | | | | | | 1 | | | | | | | 1 | | | | | | | | 1 | | | | | | | | 1 | | | | | 1 | | | | | 1 | | | 1 | | | | | 1 | | | | 1 | | | | | 1 | | | | |  | | | | 1 | | | | | | 1 | | | | | 1 | | | | | 1 | | | | 1 | | | | | 1 | | | | | 1 | | | | | 1 | | | | | | 1 | | | | 1 | | | | | |  | | | | | 1 | | | | | 1 | | | | | 1 | | | | | 1 | | | | | 1 | | | | | 1 | | | | | 1 | | | | 1 | | | |  | | | | 1 | | | 1 | | | | 1 | | | | 1 | | | | 1 | | | 1 | | | | | 1 | 1 | | | | | | 1 | | | | | 1 | | | | 1 | | | | 1 | 1 | | | | 1 | | | | 1 | | | |
| **D** | | **900** | | | | | 1 | | |  | | | | 1 | | | | | | | | | | | | | | 1 | | | | | | | | | 1 | | | | | | | 1 | | | | | | | | 1 | | | | | | | | 1 | | | | | 1 | | | | | 1 | | | 1 | | | | | 1 | | | | 1 | | | | | 1 | | | | | 1 | | | | 1 | | | | | | 1 | | | | | 1 | | | | |  | | | |  | | | | |  | | | | |  | | | | | 1 | | | | | | 1 | | | |  | | | | | |  | | | | |  | | | | |  | | | | |  | | | | |  | | | | |  | | | | |  | | | | | 1 | | | |  | | | |  | | | |  | | |  | | | |  | | | |  | | | |  | | |  | | | | |  |  | | | | | |  | | | | |  | | | |  | | | |  |  | | | |  | | | |  | | | |
| **E** | | **1000** | | | | | 1 | | |  | | | |  | | | | | | | | | | | | | |  | | | | | | | | |  | | | | | | |  | | | | | | | |  | | | | | | | |  | | | | |  | | | | |  | | |  | | | | |  | | | |  | | | | |  | | | | | 1 | | | |  | | | | | |  | | | | |  | | | | | 1 | | | | 1 | | | | | 1 | | | | | 1 | | | | | 1 | | | | | |  | | | | 1 | | | | | |  | | | | | 1 | | | | | 1 | | | | | 1 | | | | | 1 | | | | | 1 | | | | | 1 | | | | | 1 | | | | 1 | | | | 1 | | | | 1 | | | 1 | | | | 1 | | | | 1 | | | | 1 | | | 1 | | | | | 1 | 1 | | | | | | 1 | | | | | 1 | | | | 1 | | | | 1 | 1 | | | | 1 | | | | 1 | | | |
| **F** | | **1100** | | | | | 1 | | |  | | | | 1 | | | | | | | | | | | | | | 1 | | | | | | | | | 1 | | | | | | | 1 | | | | | | | | 1 | | | | | | | | 1 | | | | | 1 | | | | | 1 | | | 1 | | | | | 1 | | | | 1 | | | | | 1 | | | | | 1 | | | | 1 | | | | | | 1 | | | | | 1 | | | | | 1 | | | | 1 | | | | | 1 | | | | | 1 | | | | | 1 | | | | | | 1 | | | | 1 | | | | | |  | | | | | 1 | | | | | 1 | | | | | 1 | | | | | 1 | | | | | 1 | | | | | 1 | | | | | 1 | | | | 1 | | | | 1 | | | | 1 | | | 1 | | | | 1 | | | | 1 | | | | 1 | | | 1 | | | | | 1 | 1 | | | | | | 1 | | | | | 1 | | | | 1 | | | | 1 | 1 | | | | 1 | | | | 1 | | | |
|  | |  | | | | |  | | |  | | | |  | | | | | | | | | | | | | |  | | | | | | | | |  | | | | | | |  | | | | | | | |  | | | | | | | |  | | | | |  | | | | |  | | |  | | | | |  | | | |  | | | | |  | | | | |  | | | |  | | | | | |  | | | | |  | | | | |  | | | |  | | | | |  | | | | |  | | | | |  | | | | | |  | | | |  | | | | | |  | | | | |  | | | | |  | | | | |  | | | | |  | | | | |  | | | | |  | | | | |  | | | |  | | | |  | | | |  | | |  | | | |  | | | |  | | | |  | | |  | | | | |  |  | | | | | |  | | | | |  | | | |  | | | |  |  | | | |  | | | |  | | | |
| **UBC 834** | | | | | | |  | | |  | | | |  | | | | | | | | | | | | | |  | | | | | | | | |  | | | | | | |  | | | | | | | |  | | | | | | | |  | | | | |  | | | | |  | | |  | | | | |  | | | |  | | | | |  | | | | |  | | | |  | | | | | |  | | | | |  | | | | |  | | | |  | | | | |  | | | | |  | | | | |  | | | | | |  | | | |  | | | | | |  | | | | |  | | | | |  | | | | |  | | | | |  | | | | |  | | | | |  | | | | |  | | | |  | | | |  | | | |  | | |  | | | |  | | | |  | | | |  | | |  | | | | |  |  | | | | | |  | | | | |  | | | |  | | | |  |  | | | |  | | | |  | | | |
| **A** | | **250** | | | | |  | | |  | | | |  | | | | | | | | | | | | | |  | | | | | | | | |  | | | | | | | 1 | | | | | | | | 1 | | | | | | | | 1 | | | | |  | | | | |  | | |  | | | | |  | | | |  | | | | | 1 | | | | | 1 | | | |  | | | | | |  | | | | |  | | | | |  | | | |  | | | | |  | | | | |  | | | | |  | | | | | |  | | | |  | | | | | |  | | | | |  | | | | |  | | | | |  | | | | |  | | | | |  | | | | |  | | | | |  | | | |  | | | |  | | | |  | | |  | | | |  | | | |  | | | |  | | |  | | | | |  |  | | | | | |  | | | | |  | | | |  | | | |  |  | | | |  | | | |  | | | |
| **B** | | **300** | | | | | 1 | | | 1 | | | | 1 | | | | | | | | | | | | | | 1 | | | | | | | | |  | | | | | | |  | | | | | | | |  | | | | | | | |  | | | | | 1 | | | | |  | | | 1 | | | | | 1 | | | | 1 | | | | |  | | | | |  | | | | 1 | | | | | | 1 | | | | | 1 | | | | | 1 | | | | 1 | | | | | 1 | | | | | 1 | | | | | 1 | | | | | | 1 | | | | 1 | | | | | |  | | | | | 1 | | | | | 1 | | | | | 1 | | | | | 1 | | | | | 1 | | | | | 1 | | | | | 1 | | | | 1 | | | | 1 | | | | 1 | | | 1 | | | |  | | | | 1 | | | | 1 | | | 1 | | | | | 1 | 1 | | | | | | 1 | | | | | 1 | | | | 1 | | | | 1 | 1 | | | | 1 | | | | 1 | | | |
| **C** | | **500** | | | | | 1 | | |  | | | | 1 | | | | | | | | | | | | | | 1 | | | | | | | | | 1 | | | | | | | 1 | | | | | | | | 1 | | | | | | | | 1 | | | | |  | | | | |  | | | 1 | | | | | 1 | | | | 1 | | | | | 1 | | | | | 1 | | | | 1 | | | | | | 1 | | | | | 1 | | | | | 1 | | | | 1 | | | | | 1 | | | | | 1 | | | | | 1 | | | | | | 1 | | | | 1 | | | | | |  | | | | | 1 | | | | | 1 | | | | | 1 | | | | | 1 | | | | | 1 | | | | | 1 | | | | | 1 | | | | 1 | | | | 1 | | | | 1 | | | 1 | | | | 1 | | | | 1 | | | | 1 | | | 1 | | | | | 1 | 1 | | | | | | 1 | | | | | 1 | | | | 1 | | | | 1 | 1 | | | | 1 | | | | 1 | | | |
| **D** | | **550** | | | | |  | | |  | | | |  | | | | | | | | | | | | | | 1 | | | | | | | | | 1 | | | | | | |  | | | | | | | | 1 | | | | | | | |  | | | | |  | | | | | 1 | | |  | | | | |  | | | |  | | | | | 1 | | | | |  | | | |  | | | | | |  | | | | |  | | | | |  | | | |  | | | | | 1 | | | | |  | | | | |  | | | | | | 1 | | | |  | | | | | |  | | | | |  | | | | |  | | | | |  | | | | |  | | | | |  | | | | |  | | | | |  | | | |  | | | | 1 | | | | 1 | | | 1 | | | |  | | | | 1 | | | | 1 | | | 1 | | | | | 1 | 1 | | | | | | 1 | | | | | 1 | | | | 1 | | | | 1 | 1 | | | | 1 | | | | 1 | | | |
| **E** | | **750** | | | | |  | | |  | | | | 1 | | | | | | | | | | | | | |  | | | | | | | | |  | | | | | | |  | | | | | | | |  | | | | | | | |  | | | | |  | | | | | 1 | | |  | | | | | 1 | | | | 1 | | | | |  | | | | |  | | | |  | | | | | |  | | | | |  | | | | |  | | | |  | | | | | 1 | | | | |  | | | | | 1 | | | | | | 1 | | | | 1 | | | | | |  | | | | | 1 | | | | | 1 | | | | |  | | | | | 1 | | | | | 1 | | | | | 1 | | | | | 1 | | | | 1 | | | |  | | | |  | | |  | | | |  | | | | 1 | | | | 1 | | | 1 | | | | |  | 1 | | | | | | 1 | | | | | 1 | | | | 1 | | | | 1 | 1 | | | | 1 | | | | 1 | | | |
| **F** | | **800** | | | | |  | | |  | | | |  | | | | | | | | | | | | | |  | | | | | | | | |  | | | | | | |  | | | | | | | |  | | | | | | | |  | | | | |  | | | | |  | | |  | | | | |  | | | |  | | | | |  | | | | |  | | | |  | | | | | |  | | | | | 1 | | | | |  | | | | 1 | | | | |  | | | | |  | | | | |  | | | | | |  | | | |  | | | | | |  | | | | |  | | | | |  | | | | |  | | | | |  | | | | |  | | | | |  | | | | |  | | | |  | | | | 1 | | | | 1 | | | 1 | | | |  | | | | 1 | | | |  | | |  | | | | |  |  | | | | | | 1 | | | | | 1 | | | |  | | | |  |  | | | |  | | | |  | | | |
| **G** | | **1000** | | | | |  | | |  | | | |  | | | | | | | | | | | | | |  | | | | | | | | |  | | | | | | |  | | | | | | | |  | | | | | | | |  | | | | |  | | | | | 1 | | |  | | | | |  | | | |  | | | | | 1 | | | | |  | | | |  | | | | | |  | | | | |  | | | | |  | | | |  | | | | | 1 | | | | |  | | | | |  | | | | | | 1 | | | |  | | | | | |  | | | | | 1 | | | | | 1 | | | | |  | | | | |  | | | | |  | | | | |  | | | | | 1 | | | |  | | | |  | | | |  | | |  | | | |  | | | | 1 | | | |  | | |  | | | | |  |  | | | | | |  | | | | |  | | | |  | | | | 1 | 1 | | | |  | | | | 1 | | | |
| **H** | | **1100** | | | | |  | | |  | | | |  | | | | | | | | | | | | | |  | | | | | | | | | 1 | | | | | | |  | | | | | | | |  | | | | | | | |  | | | | |  | | | | | 1 | | |  | | | | |  | | | |  | | | | |  | | | | |  | | | |  | | | | | | 1 | | | | | 1 | | | | |  | | | | 1 | | | | |  | | | | |  | | | | |  | | | | | | 1 | | | |  | | | | | |  | | | | |  | | | | |  | | | | |  | | | | |  | | | | |  | | | | |  | | | | |  | | | |  | | | |  | | | |  | | |  | | | |  | | | |  | | | |  | | |  | | | | |  |  | | | | | |  | | | | |  | | | |  | | | |  |  | | | |  | | | |  | | | |
| **I** | | **1300** | | | | | 1 | | |  | | | | 1 | | | | | | | | | | | | | | 1 | | | | | | | | | 1 | | | | | | | 1 | | | | | | | | 1 | | | | | | | | 1 | | | | | 1 | | | | |  | | | 1 | | | | | 1 | | | | 1 | | | | | 1 | | | | | 1 | | | |  | | | | | |  | | | | | 1 | | | | | 1 | | | |  | | | | | 1 | | | | | 1 | | | | | 1 | | | | | |  | | | | 1 | | | | | |  | | | | | 1 | | | | | 1 | | | | | 1 | | | | | 1 | | | | | 1 | | | | | 1 | | | | | 1 | | | | 1 | | | | 1 | | | | 1 | | | 1 | | | |  | | | | 1 | | | | 1 | | | 1 | | | | | 1 | 1 | | | | | | 1 | | | | | 1 | | | | 1 | | | | 1 | 1 | | | | 1 | | | | 1 | | | |
|  | |  | | | | |  | | |  | | | |  | | | | | | | | | | | | | |  | | | | | | | | |  | | | | | | |  | | | | | | | |  | | | | | | | |  | | | | |  | | | | |  | | |  | | | | |  | | | |  | | | | |  | | | | |  | | | |  | | | | | |  | | | | |  | | | | |  | | | |  | | | | |  | | | | |  | | | | |  | | | | | |  | | | |  | | | | | |  | | | | |  | | | | |  | | | | |  | | | | |  | | | | |  | | | | |  | | | | |  | | | |  | | | |  | | | |  | | |  | | | |  | | | |  | | | |  | | |  | | | | |  |  | | | | | |  | | | | |  | | | |  | | | |  |  | | | |  | | | |  | | | |
| **UBC 835** | | | | | | |  | | |  | | | |  | | | | | | | | | | | | | |  | | | | | | | | |  | | | | | | |  | | | | | | | |  | | | | | | | |  | | | | |  | | | | |  | | |  | | | | |  | | | |  | | | | |  | | | | |  | | | |  | | | | | |  | | | | |  | | | | |  | | | |  | | | | |  | | | | |  | | | | |  | | | | | |  | | | |  | | | | | |  | | | | |  | | | | |  | | | | |  | | | | |  | | | | |  | | | | |  | | | | |  | | | |  | | | |  | | | |  | | |  | | | |  | | | |  | | | |  | | |  | | | | |  |  | | | | | |  | | | | |  | | | |  | | | |  |  | | | |  | | | |  | | | |
| **A** | | **250** | | | | | 1 | | |  | | | | 1 | | | | | | | | | | | | | | 1 | | | | | | | | | 1 | | | | | | | 1 | | | | | | | | 1 | | | | | | | |  | | | | | 1 | | | | |  | | | 1 | | | | | 1 | | | |  | | | | |  | | | | |  | | | | 1 | | | | | |  | | | | | 1 | | | | | 1 | | | | 1 | | | | | 1 | | | | | 1 | | | | | 1 | | | | | | 1 | | | | 1 | | | | | | 1 | | | | | 1 | | | | | 1 | | | | | 1 | | | | | 1 | | | | | 1 | | | | | 1 | | | | | 1 | | | | 1 | | | | 1 | | | | 1 | | | 1 | | | | 1 | | | | 1 | | | | 1 | | | 1 | | | | | 1 | 1 | | | | | | 1 | | | | | 1 | | | | 1 | | | | 1 | 1 | | | |  | | | |  | | | |
| **B** | | **350** | | | | | 1 | | |  | | | | 1 | | | | | | | | | | | | | | 1 | | | | | | | | | 1 | | | | | | | 1 | | | | | | | | 1 | | | | | | | |  | | | | | 1 | | | | | 1 | | | 1 | | | | | 1 | | | | 1 | | | | | 1 | | | | | 1 | | | | 1 | | | | | | 1 | | | | | 1 | | | | | 1 | | | | 1 | | | | | 1 | | | | | 1 | | | | | 1 | | | | | | 1 | | | | 1 | | | | | | 1 | | | | | 1 | | | | | 1 | | | | | 1 | | | | | 1 | | | | | 1 | | | | | 1 | | | | | 1 | | | | 1 | | | | 1 | | | | 1 | | | 1 | | | | 1 | | | | 1 | | | | 1 | | | 1 | | | | | 1 | 1 | | | | | | 1 | | | | | 1 | | | | 1 | | | | 1 | 1 | | | | 1 | | | | 1 | | | |
| **C** | | 400 | | | | | 1 | | |  | | | | 1 | | | | | | | | | | | | | | 1 | | | | | | | | | 1 | | | | | | | 1 | | | | | | | | 1 | | | | | | | |  | | | | | 1 | | | | | 1 | | | 1 | | | | | 1 | | | | 1 | | | | | 1 | | | | | 1 | | | | 1 | | | | | | 1 | | | | | 1 | | | | | 1 | | | | 1 | | | | | 1 | | | | | 1 | | | | | 1 | | | | | | 1 | | | | 1 | | | | | | 1 | | | | | 1 | | | | | 1 | | | | | 1 | | | | | 1 | | | | | 1 | | | | | 1 | | | | | 1 | | | | 1 | | | | 1 | | | | 1 | | | 1 | | | | 1 | | | | 1 | | | | 1 | | | 1 | | | | | 1 | 1 | | | | | | 1 | | | | | 1 | | | | 1 | | | | 1 | 1 | | | | 1 | | | | 1 | | | |
| **D** | | **480** | | | | |  | | |  | | | |  | | | | | | | | | | | | | |  | | | | | | | | |  | | | | | | |  | | | | | | | |  | | | | | | | |  | | | | |  | | | | |  | | |  | | | | |  | | | |  | | | | |  | | | | |  | | | |  | | | | | |  | | | | | 1 | | | | |  | | | |  | | | | |  | | | | |  | | | | |  | | | | | |  | | | |  | | | | | |  | | | | |  | | | | |  | | | | |  | | | | |  | | | | |  | | | | |  | | | | |  | | | |  | | | |  | | | |  | | |  | | | |  | | | |  | | | |  | | |  | | | | |  |  | | | | | |  | | | | |  | | | |  | | | |  |  | | | |  | | | |  | | | |
| **E** | | **500** | | | | | 1 | | |  | | | |  | | | | | | | | | | | | | |  | | | | | | | | |  | | | | | | |  | | | | | | | |  | | | | | | | |  | | | | | 1 | | | | | 1 | | |  | | | | | 1 | | | | 1 | | | | |  | | | | |  | | | |  | | | | | |  | | | | | 1 | | | | |  | | | |  | | | | |  | | | | |  | | | | | 1 | | | | | | 1 | | | | 1 | | | | | | 1 | | | | | 1 | | | | | 1 | | | | | 1 | | | | | 1 | | | | | 1 | | | | | 1 | | | | | 1 | | | | 1 | | | | 1 | | | | 1 | | | 1 | | | | 1 | | | | 1 | | | | 1 | | | 1 | | | | | 1 | 1 | | | | | | 1 | | | | | 1 | | | | 1 | | | | 1 | 1 | | | | 1 | | | | 1 | | | |
| **F** | | **550** | | | | | 1 | | |  | | | | 1 | | | | | | | | | | | | | | 1 | | | | | | | | | 1 | | | | | | | 1 | | | | | | | | 1 | | | | | | | |  | | | | |  | | | | |  | | | 1 | | | | |  | | | |  | | | | | 1 | | | | | 1 | | | | 1 | | | | | | 1 | | | | | 1 | | | | | 1 | | | | 1 | | | | | 1 | | | | | 1 | | | | | 1 | | | | | | 1 | | | | 1 | | | | | | 1 | | | | | 1 | | | | | 1 | | | | | 1 | | | | | 1 | | | | | 1 | | | | | 1 | | | | | 1 | | | | 1 | | | | 1 | | | |  | | |  | | | |  | | | |  | | | |  | | |  | | | | |  |  | | | | | |  | | | | |  | | | |  | | | |  |  | | | |  | | | |  | | | |
| **G** | | **700** | | | | | 1 | | |  | | | | 1 | | | | | | | | | | | | | | 1 | | | | | | | | | 1 | | | | | | | 1 | | | | | | | | 1 | | | | | | | |  | | | | | 1 | | | | | 1 | | | 1 | | | | | 1 | | | | 1 | | | | | 1 | | | | | 1 | | | |  | | | | | | 1 | | | | | 1 | | | | | 1 | | | | 1 | | | | | 1 | | | | | 1 | | | | | 1 | | | | | | 1 | | | | 1 | | | | | | 1 | | | | | 1 | | | | | 1 | | | | | 1 | | | | | 1 | | | | | 1 | | | | | 1 | | | | | 1 | | | | 1 | | | | 1 | | | | 1 | | | 1 | | | | 1 | | | | 1 | | | | 1 | | | 1 | | | | | 1 | 1 | | | | | | 1 | | | | | 1 | | | | 1 | | | | 1 | 1 | | | | 1 | | | |  | | | |
| **H** | | **900** | | | | | 1 | | |  | | | | 1 | | | | | | | | | | | | | | 1 | | | | | | | | | 1 | | | | | | | 1 | | | | | | | |  | | | | | | | |  | | | | | 1 | | | | | 1 | | | 1 | | | | |  | | | |  | | | | | 1 | | | | | 1 | | | | 1 | | | | | | 1 | | | | | 1 | | | | | 1 | | | | 1 | | | | | 1 | | | | | 1 | | | | | 1 | | | | | | 1 | | | | 1 | | | | | | 1 | | | | | 1 | | | | | 1 | | | | | 1 | | | | | 1 | | | | | 1 | | | | | 1 | | | | | 1 | | | | 1 | | | | 1 | | | | 1 | | | 1 | | | | 1 | | | | 1 | | | | 1 | | | 1 | | | | | 1 | 1 | | | | | | 1 | | | | | 1 | | | | 1 | | | | 1 | 1 | | | | 1 | | | |  | | | |
| **I** | | **1250** | | | | | 1 | | |  | | | | 1 | | | | | | | | | | | | | | 1 | | | | | | | | | 1 | | | | | | | 1 | | | | | | | | 1 | | | | | | | |  | | | | | 1 | | | | | 1 | | |  | | | | | 1 | | | | 1 | | | | | 1 | | | | | 1 | | | |  | | | | | | 1 | | | | | 1 | | | | | 1 | | | | 1 | | | | | 1 | | | | | 1 | | | | | 1 | | | | | | 1 | | | | 1 | | | | | | 1 | | | | | 1 | | | | | 1 | | | | | 1 | | | | | 1 | | | | | 1 | | | | | 1 | | | | | 1 | | | | 1 | | | | 1 | | | | 1 | | | 1 | | | | 1 | | | | 1 | | | | 1 | | | 1 | | | | | 1 | 1 | | | | | | 1 | | | | | 1 | | | | 1 | | | | 1 | 1 | | | | 1 | | | | 1 | | | |
|  | |  | | | | |  | | |  | | | |  | | | | | | | | | | | | | |  | | | | | | | | |  | | | | | | |  | | | | | | | |  | | | | | | | |  | | | | |  | | | | |  | | |  | | | | |  | | | |  | | | | |  | | | | |  | | | |  | | | | | |  | | | | |  | | | | |  | | | |  | | | | |  | | | | |  | | | | |  | | | | | |  | | | |  | | | | | |  | | | | |  | | | | |  | | | | |  | | | | |  | | | | |  | | | | |  | | | | |  | | | |  | | | |  | | | |  | | |  | | | |  | | | |  | | | |  | | |  | | | | |  |  | | | | | |  | | | | |  | | | |  | | | |  |  | | | |  | | | |  | | | |
| **UBC 840** | | | | | | |  | | |  | | | |  | | | | | | | | | | | | | |  | | | | | | | | |  | | | | | | |  | | | | | | | |  | | | | | | | |  | | | | |  | | | | |  | | |  | | | | |  | | | |  | | | | |  | | | | |  | | | |  | | | | | |  | | | | |  | | | | |  | | | |  | | | | |  | | | | |  | | | | |  | | | | | |  | | | |  | | | | | |  | | | | |  | | | | |  | | | | |  | | | | |  | | | | |  | | | | |  | | | | |  | | | |  | | | |  | | | |  | | |  | | | |  | | | |  | | | |  | | |  | | | | |  |  | | | | | |  | | | | |  | | | |  | | | |  |  | | | |  | | | |  | | | |
| **A** | | **300** | | | | |  | | |  | | | |  | | | | | | | | | | | | | |  | | | | | | | | |  | | | | | | | 1 | | | | | | | | 1 | | | | | | | |  | | | | |  | | | | |  | | |  | | | | |  | | | |  | | | | |  | | | | |  | | | |  | | | | | |  | | | | | 1 | | | | |  | | | |  | | | | |  | | | | |  | | | | |  | | | | | |  | | | |  | | | | | |  | | | | |  | | | | |  | | | | |  | | | | |  | | | | |  | | | | |  | | | | |  | | | |  | | | |  | | | |  | | |  | | | |  | | | |  | | | |  | | |  | | | | |  |  | | | | | |  | | | | |  | | | |  | | | |  |  | | | |  | | | |  | | | |
| **B** | | **500** | | | | | 1 | | | 1 | | | | 1 | | | | | | | | | | | | | | 1 | | | | | | | | | 1 | | | | | | | 1 | | | | | | | | 1 | | | | | | | | 1 | | | | | 1 | | | | | 1 | | | 1 | | | | | 1 | | | | 1 | | | | | 1 | | | | | 1 | | | | 1 | | | | | | 1 | | | | | 1 | | | | | 1 | | | | 1 | | | | | 1 | | | | | 1 | | | | | 1 | | | | | | 1 | | | | 1 | | | | | | 1 | | | | | 1 | | | | | 1 | | | | | 1 | | | | | 1 | | | | | 1 | | | | | 1 | | | | | 1 | | | | 1 | | | | 1 | | | | 1 | | | 1 | | | | 1 | | | | 1 | | | | 1 | | | 1 | | | | | 1 | 1 | | | | | | 1 | | | | | 1 | | | | 1 | | | | 1 | 1 | | | | 1 | | | | 1 | | | |
| **C** | | 650 | | | | | 1 | | | 1 | | | | 1 | | | | | | | | | | | | | | 1 | | | | | | | | | 1 | | | | | | | 1 | | | | | | | | 1 | | | | | | | | 1 | | | | | 1 | | | | | 1 | | | 1 | | | | | 1 | | | | 1 | | | | | 1 | | | | |  | | | | 1 | | | | | | 1 | | | | | 1 | | | | | 1 | | | | 1 | | | | | 1 | | | | | 1 | | | | | 1 | | | | | | 1 | | | | 1 | | | | | | 1 | | | | | 1 | | | | | 1 | | | | | 1 | | | | | 1 | | | | | 1 | | | | | 1 | | | | | 1 | | | | 1 | | | | 1 | | | | 1 | | | 1 | | | | 1 | | | | 1 | | | | 1 | | | 1 | | | | | 1 | 1 | | | | | | 1 | | | | | 1 | | | | 1 | | | | 1 |  | | | | 1 | | | | 1 | | | |
| **D** | | **1000** | | | | | 1 | | |  | | | |  | | | | | | | | | | | | | | 1 | | | | | | | | | 1 | | | | | | | 1 | | | | | | | | 1 | | | | | | | | 1 | | | | |  | | | | | 1 | | | 1 | | | | | 1 | | | | 1 | | | | |  | | | | |  | | | |  | | | | | | 1 | | | | | 1 | | | | | 1 | | | | 1 | | | | |  | | | | | 1 | | | | |  | | | | | | 1 | | | | 1 | | | | | | 1 | | | | | 1 | | | | |  | | | | | 1 | | | | | 1 | | | | | 1 | | | | | 1 | | | | | 1 | | | | 1 | | | |  | | | | 1 | | |  | | | | 1 | | | |  | | | |  | | | 1 | | | | | 1 | 1 | | | | | |  | | | | |  | | | | 1 | | | |  | 1 | | | | 1 | | | | 1 | | | |
| **E** | | **1100** | | | | |  | | |  | | | |  | | | | | | | | | | | | | |  | | | | | | | | |  | | | | | | |  | | | | | | | |  | | | | | | | |  | | | | |  | | | | |  | | |  | | | | |  | | | |  | | | | |  | | | | |  | | | |  | | | | | |  | | | | | 1 | | | | |  | | | |  | | | | |  | | | | | 1 | | | | | 1 | | | | | | 1 | | | |  | | | | | |  | | | | | 1 | | | | |  | | | | | 1 | | | | | 1 | | | | | 1 | | | | | 1 | | | | | 1 | | | | 1 | | | |  | | | |  | | | 1 | | | |  | | | |  | | | |  | | |  | | | | |  |  | | | | | |  | | | | |  | | | |  | | | |  |  | | | |  | | | |  | | | |
| **F** | | **1200** | | | | |  | | |  | | | |  | | | | | | | | | | | | | |  | | | | | | | | | 1 | | | | | | |  | | | | | | | | 1 | | | | | | | | 1 | | | | |  | | | | |  | | |  | | | | | 1 | | | |  | | | | |  | | | | |  | | | |  | | | | | |  | | | | | 1 | | | | |  | | | |  | | | | |  | | | | |  | | | | |  | | | | | | 1 | | | |  | | | | | | 1 | | | | | 1 | | | | | 1 | | | | | 1 | | | | | 1 | | | | | 1 | | | | | 1 | | | | | 1 | | | | 1 | | | | 1 | | | | 1 | | | 1 | | | | 1 | | | | 1 | | | |  | | |  | | | | | 1 | 1 | | | | | |  | | | | |  | | | |  | | | |  |  | | | | 1 | | | |  | | | |
| **G** | | **1500** | | | | |  | | |  | | | |  | | | | | | | | | | | | | | 1 | | | | | | | | |  | | | | | | |  | | | | | | | |  | | | | | | | |  | | | | |  | | | | |  | | |  | | | | |  | | | |  | | | | |  | | | | |  | | | |  | | | | | |  | | | | |  | | | | |  | | | |  | | | | |  | | | | | 1 | | | | | 1 | | | | | | 1 | | | | 1 | | | | | |  | | | | | 1 | | | | | 1 | | | | | 1 | | | | | 1 | | | | | 1 | | | | | 1 | | | | | 1 | | | | 1 | | | | 1 | | | |  | | | 1 | | | | 1 | | | |  | | | |  | | |  | | | | |  |  | | | | | |  | | | | |  | | | |  | | | |  | 1 | | | |  | | | |  | | | |
| **H** | | **1600** | | | | | 1 | | |  | | | | 1 | | | | | | | | | | | | | | 1 | | | | | | | | | 1 | | | | | | |  | | | | | | | | 1 | | | | | | | | 1 | | | | | 1 | | | | | 1 | | |  | | | | | 1 | | | | 1 | | | | |  | | | | | 1 | | | |  | | | | | | 1 | | | | | 1 | | | | | 1 | | | | 1 | | | | |  | | | | | 1 | | | | | 1 | | | | | | 1 | | | |  | | | | | | 1 | | | | |  | | | | |  | | | | |  | | | | |  | | | | |  | | | | |  | | | | |  | | | |  | | | |  | | | | 1 | | | 1 | | | |  | | | | 1 | | | | 1 | | | 1 | | | | | 1 | 1 | | | | | |  | | | | | 1 | | | | 1 | | | | 1 | 1 | | | | 1 | | | | 1 | | | |
|  | |  | | | | |  | | |  | | | |  | | | | | | | | | | | | | |  | | | | | | | | |  | | | | | | |  | | | | | | | |  | | | | | | | |  | | | | |  | | | | |  | | |  | | | | |  | | | |  | | | | |  | | | | |  | | | |  | | | | | |  | | | | |  | | | | |  | | | |  | | | | |  | | | | |  | | | | |  | | | | | |  | | | |  | | | | | |  | | | | |  | | | | |  | | | | |  | | | | |  | | | | |  | | | | |  | | | | |  | | | |  | | | |  | | | |  | | |  | | | |  | | | |  | | | |  | | |  | | | | |  |  | | | | | |  | | | | |  | | | |  | | | |  |  | | | |  | | | |  | | | |
| **UBC 841** | | | | | | |  | | |  | | | |  | | | | | | | | | | | | | |  | | | | | | | | |  | | | | | | |  | | | | | | | |  | | | | | | | |  | | | | |  | | | | |  | | |  | | | | |  | | | |  | | | | |  | | | | |  | | | |  | | | | | |  | | | | |  | | | | |  | | | |  | | | | |  | | | | |  | | | | |  | | | | | |  | | | |  | | | | | |  | | | | |  | | | | |  | | | | |  | | | | |  | | | | |  | | | | |  | | | | |  | | | |  | | | |  | | | |  | | |  | | | |  | | | |  | | | |  | | |  | | | | |  |  | | | | | |  | | | | |  | | | |  | | | |  |  | | | |  | | | |  | | | |
| **A** | | **300** | | | | | 1 | | | 1 | | | | 1 | | | | | | | | | | | | | | 1 | | | | | | | | | 1 | | | | | | | 1 | | | | | | | |  | | | | | | | |  | | | | | 1 | | | | |  | | | 1 | | | | | 1 | | | |  | | | | | 1 | | | | | 1 | | | | 1 | | | | | | 1 | | | | | 1 | | | | | 1 | | | |  | | | | | 1 | | | | | 1 | | | | | 1 | | | | | | 1 | | | | 1 | | | | | |  | | | | |  | | | | |  | | | | | 1 | | | | | 1 | | | | | 1 | | | | |  | | | | |  | | | |  | | | | 1 | | | | 1 | | | 1 | | | | 1 | | | |  | | | | 1 | | | 1 | | | | |  |  | | | | | |  | | | | |  | | | |  | | | | 1 | 1 | | | | 1 | | | | 1 | | | |
| **B** | | **400** | | | | | 1 | | | 1 | | | | 1 | | | | | | | | | | | | | | 1 | | | | | | | | | 1 | | | | | | | 1 | | | | | | | | 1 | | | | | | | | 1 | | | | | 1 | | | | | 1 | | | 1 | | | | | 1 | | | | 1 | | | | | 1 | | | | | 1 | | | | 1 | | | | | | 1 | | | | | 1 | | | | | 1 | | | | 1 | | | | | 1 | | | | | 1 | | | | | 1 | | | | | | 1 | | | | 1 | | | | | |  | | | | | 1 | | | | |  | | | | | 1 | | | | | 1 | | | | | 1 | | | | |  | | | | | 1 | | | | 1 | | | | 1 | | | | 1 | | | 1 | | | | 1 | | | | 1 | | | | 1 | | | 1 | | | | | 1 | 1 | | | | | | 1 | | | | | 1 | | | |  | | | | 1 | 1 | | | | 1 | | | | 1 | | | |
| **C** | | 500 | | | | | 1 | | | 1 | | | | 1 | | | | | | | | | | | | | | 1 | | | | | | | | | 1 | | | | | | | 1 | | | | | | | | 1 | | | | | | | | 1 | | | | | 1 | | | | | 1 | | | 1 | | | | | 1 | | | | 1 | | | | | 1 | | | | | 1 | | | | 1 | | | | | | 1 | | | | | 1 | | | | | 1 | | | | 1 | | | | | 1 | | | | | 1 | | | | | 1 | | | | | | 1 | | | | 1 | | | | | |  | | | | | 1 | | | | | 1 | | | | | 1 | | | | |  | | | | | 1 | | | | | 1 | | | | | 1 | | | | 1 | | | | 1 | | | | 1 | | | 1 | | | | 1 | | | | 1 | | | | 1 | | | 1 | | | | | 1 | 1 | | | | | | 1 | | | | | 1 | | | |  | | | | 1 | 1 | | | | 1 | | | | 1 | | | |
| **D** | | **600** | | | | | 1 | | |  | | | |  | | | | | | | | | | | | | |  | | | | | | | | |  | | | | | | |  | | | | | | | |  | | | | | | | |  | | | | |  | | | | |  | | |  | | | | | 1 | | | |  | | | | | 1 | | | | |  | | | |  | | | | | |  | | | | |  | | | | |  | | | |  | | | | |  | | | | |  | | | | |  | | | | | |  | | | | 1 | | | | | |  | | | | |  | | | | |  | | | | |  | | | | |  | | | | |  | | | | |  | | | | |  | | | |  | | | |  | | | |  | | |  | | | | 1 | | | |  | | | |  | | |  | | | | |  |  | | | | | |  | | | | |  | | | |  | | | |  |  | | | | 1 | | | |  | | | |
| **E** | | **700** | | | | | 1 | | | 1 | | | | 1 | | | | | | | | | | | | | | 1 | | | | | | | | | 1 | | | | | | | 1 | | | | | | | | 1 | | | | | | | | 1 | | | | | 1 | | | | | 1 | | | 1 | | | | | 1 | | | | 1 | | | | | 1 | | | | | 1 | | | | 1 | | | | | | 1 | | | | | 1 | | | | | 1 | | | | 1 | | | | | 1 | | | | | 1 | | | | | 1 | | | | | | 1 | | | | 1 | | | | | | 1 | | | | | 1 | | | | | 1 | | | | | 1 | | | | | 1 | | | | | 1 | | | | | 1 | | | | | 1 | | | | 1 | | | | 1 | | | | 1 | | | 1 | | | | 1 | | | | 1 | | | | 1 | | | 1 | | | | | 1 | 1 | | | | | | 1 | | | | | 1 | | | | 1 | | | | 1 | 1 | | | | 1 | | | | 1 | | | |
| **F** | | **800** | | | | | 1 | | | 1 | | | | 1 | | | | | | | | | | | | | | 1 | | | | | | | | | 1 | | | | | | | 1 | | | | | | | | 1 | | | | | | | | 1 | | | | | 1 | | | | | 1 | | | 1 | | | | | 1 | | | | 1 | | | | | 1 | | | | | 1 | | | | 1 | | | | | | 1 | | | | | 1 | | | | | 1 | | | | 1 | | | | | 1 | | | | | 1 | | | | | 1 | | | | | | 1 | | | | 1 | | | | | | 1 | | | | | 1 | | | | | 1 | | | | | 1 | | | | | 1 | | | | | 1 | | | | | 1 | | | | | 1 | | | | 1 | | | | 1 | | | | 1 | | | 1 | | | | 1 | | | | 1 | | | | 1 | | | 1 | | | | | 1 | 1 | | | | | | 1 | | | | | 1 | | | | 1 | | | | 1 | 1 | | | | 1 | | | | 1 | | | |
|  | |  | | | | |  | | |  | | | |  | | | | | | | | | | | | | |  | | | | | | | | |  | | | | | | |  | | | | | | | |  | | | | | | | |  | | | | |  | | | | |  | | |  | | | | |  | | | |  | | | | |  | | | | |  | | | |  | | | | | |  | | | | |  | | | | |  | | | |  | | | | |  | | | | |  | | | | |  | | | | | |  | | | |  | | | | | |  | | | | |  | | | | |  | | | | |  | | | | |  | | | | |  | | | | |  | | | | |  | | | |  | | | |  | | | |  | | |  | | | |  | | | |  | | | |  | | |  | | | | |  |  | | | | | |  | | | | |  | | | |  | | | |  |  | | | |  | | | |  | | | |
| **UBC 842** | | | | | | |  | | |  | | | |  | | | | | | | | | | | | | |  | | | | | | | | |  | | | | | | |  | | | | | | | |  | | | | | | | |  | | | | |  | | | | |  | | |  | | | | |  | | | |  | | | | |  | | | | |  | | | |  | | | | | |  | | | | |  | | | | |  | | | |  | | | | |  | | | | |  | | | | |  | | | | | |  | | | |  | | | | | |  | | | | |  | | | | |  | | | | |  | | | | |  | | | | |  | | | | |  | | | | |  | | | |  | | | |  | | | |  | | |  | | | |  | | | |  | | | |  | | |  | | | | |  |  | | | | | |  | | | | |  | | | |  | | | |  |  | | | |  | | | |  | | | |
| **A** | | **200** | | | | |  | | |  | | | | 1 | | | | | | | | | | | | | | 1 | | | | | | | | | 1 | | | | | | |  | | | | | | | |  | | | | | | | |  | | | | |  | | | | |  | | |  | | | | |  | | | | 1 | | | | | 1 | | | | | 1 | | | | 1 | | | | | | 1 | | | | | 1 | | | | | 1 | | | | 1 | | | | | 1 | | | | | 1 | | | | | 1 | | | | | | 1 | | | | 1 | | | | | |  | | | | | 1 | | | | | 1 | | | | |  | | | | |  | | | | |  | | | | |  | | | | | 1 | | | |  | | | | 1 | | | | 1 | | | 1 | | | | 1 | | | | 1 | | | | 1 | | | 1 | | | | | 1 | 1 | | | | | | 1 | | | | | 1 | | | | 1 | | | | 1 | 1 | | | | 1 | | | | 1 | | | |
| **B** | | **300** | | | | |  | | |  | | | |  | | | | | | | | | | | | | | 1 | | | | | | | | |  | | | | | | | 1 | | | | | | | |  | | | | | | | |  | | | | |  | | | | |  | | |  | | | | |  | | | | 1 | | | | | 1 | | | | | 1 | | | | 1 | | | | | | 1 | | | | | 1 | | | | | 1 | | | | 1 | | | | | 1 | | | | | 1 | | | | | 1 | | | | | | 1 | | | | 1 | | | | | |  | | | | | 1 | | | | | 1 | | | | |  | | | | |  | | | | |  | | | | | 1 | | | | | 1 | | | | 1 | | | | 1 | | | | 1 | | | 1 | | | | 1 | | | | 1 | | | | 1 | | | 1 | | | | | 1 | 1 | | | | | | 1 | | | | | 1 | | | | 1 | | | | 1 | 1 | | | | 1 | | | | 1 | | | |
| **C** | | 350 | | | | | 1 | | |  | | | | 1 | | | | | | | | | | | | | | 1 | | | | | | | | | 1 | | | | | | | 1 | | | | | | | |  | | | | | | | | 1 | | | | | 1 | | | | | 1 | | | 1 | | | | | 1 | | | | 1 | | | | | 1 | | | | | 1 | | | | 1 | | | | | | 1 | | | | | 1 | | | | | 1 | | | | 1 | | | | | 1 | | | | | 1 | | | | | 1 | | | | | | 1 | | | | 1 | | | | | |  | | | | | 1 | | | | | 1 | | | | | 1 | | | | | 1 | | | | | 1 | | | | | 1 | | | | | 1 | | | | 1 | | | | 1 | | | | 1 | | | 1 | | | |  | | | | 1 | | | | 1 | | | 1 | | | | | 1 | 1 | | | | | | 1 | | | | | 1 | | | | 1 | | | | 1 | 1 | | | | 1 | | | | 1 | | | |
| **D** | | **600** | | | | | 1 | | |  | | | | 1 | | | | | | | | | | | | | | 1 | | | | | | | | | 1 | | | | | | | 1 | | | | | | | |  | | | | | | | | 1 | | | | | 1 | | | | | 1 | | | 1 | | | | | 1 | | | | 1 | | | | | 1 | | | | | 1 | | | | 1 | | | | | | 1 | | | | | 1 | | | | | 1 | | | | 1 | | | | | 1 | | | | | 1 | | | | | 1 | | | | | | 1 | | | | 1 | | | | | |  | | | | | 1 | | | | | 1 | | | | | 1 | | | | | 1 | | | | | 1 | | | | | 1 | | | | | 1 | | | |  | | | | 1 | | | | 1 | | | 1 | | | |  | | | | 1 | | | | 1 | | | 1 | | | | | 1 | 1 | | | | | | 1 | | | | | 1 | | | | 1 | | | | 1 | 1 | | | | 1 | | | | 1 | | | |
| **E** | | **650** | | | | |  | | |  | | | |  | | | | | | | | | | | | | |  | | | | | | | | |  | | | | | | |  | | | | | | | |  | | | | | | | | 1 | | | | | 1 | | | | | 1 | | | 1 | | | | | 1 | | | |  | | | | |  | | | | |  | | | |  | | | | | |  | | | | |  | | | | |  | | | |  | | | | | 1 | | | | | 1 | | | | | 1 | | | | | | 1 | | | | 1 | | | | | |  | | | | |  | | | | | 1 | | | | | 1 | | | | | 1 | | | | | 1 | | | | |  | | | | | 1 | | | |  | | | | 1 | | | |  | | |  | | | |  | | | |  | | | |  | | |  | | | | |  |  | | | | | |  | | | | |  | | | |  | | | | 1 | 1 | | | | 1 | | | |  | | | |
| **F** | | **800** | | | | | 1 | | |  | | | | 1 | | | | | | | | | | | | | | 1 | | | | | | | | | 1 | | | | | | |  | | | | | | | |  | | | | | | | | 1 | | | | | 1 | | | | | 1 | | | 1 | | | | | 1 | | | |  | | | | |  | | | | |  | | | |  | | | | | |  | | | | |  | | | | |  | | | |  | | | | | 1 | | | | | 1 | | | | | 1 | | | | | | 1 | | | | 1 | | | | | |  | | | | | 1 | | | | | 1 | | | | | 1 | | | | | 1 | | | | | 1 | | | | |  | | | | | 1 | | | |  | | | | 1 | | | |  | | |  | | | |  | | | |  | | | |  | | |  | | | | |  |  | | | | | |  | | | | |  | | | |  | | | | 1 | 1 | | | | 1 | | | |  | | | |
| **G** | | **1000** | | | | | 1 | | |  | | | | 1 | | | | | | | | | | | | | | 1 | | | | | | | | | 1 | | | | | | | 1 | | | | | | | |  | | | | | | | | 1 | | | | | 1 | | | | | 1 | | | 1 | | | | | 1 | | | |  | | | | |  | | | | |  | | | |  | | | | | |  | | | | |  | | | | |  | | | |  | | | | | 1 | | | | | 1 | | | | | 1 | | | | | | 1 | | | | 1 | | | | | |  | | | | | 1 | | | | | 1 | | | | | 1 | | | | | 1 | | | | | 1 | | | | |  | | | | | 1 | | | |  | | | |  | | | |  | | |  | | | |  | | | |  | | | |  | | |  | | | | |  |  | | | | | |  | | | | |  | | | |  | | | |  |  | | | |  | | | |  | | | |
| **H** | | **1050** | | | | |  | | |  | | | |  | | | | | | | | | | | | | |  | | | | | | | | |  | | | | | | |  | | | | | | | |  | | | | | | | | 1 | | | | | 1 | | | | | 1 | | | 1 | | | | | 1 | | | |  | | | | |  | | | | |  | | | |  | | | | | |  | | | | |  | | | | |  | | | |  | | | | |  | | | | |  | | | | |  | | | | | |  | | | |  | | | | | |  | | | | |  | | | | |  | | | | |  | | | | |  | | | | |  | | | | |  | | | | |  | | | |  | | | |  | | | |  | | |  | | | |  | | | |  | | | |  | | |  | | | | |  |  | | | | | |  | | | | |  | | | |  | | | |  |  | | | |  | | | |  | | | |
| **I** | | **1100** | | | | |  | | |  | | | |  | | | | | | | | | | | | | |  | | | | | | | | |  | | | | | | |  | | | | | | | |  | | | | | | | | 1 | | | | | 1 | | | | | 1 | | | 1 | | | | | 1 | | | |  | | | | |  | | | | |  | | | |  | | | | | |  | | | | |  | | | | |  | | | |  | | | | |  | | | | |  | | | | |  | | | | | |  | | | |  | | | | | |  | | | | |  | | | | |  | | | | |  | | | | |  | | | | |  | | | | |  | | | | |  | | | |  | | | |  | | | |  | | |  | | | |  | | | |  | | | |  | | |  | | | | |  |  | | | | | |  | | | | |  | | | |  | | | |  |  | | | |  | | | |  | | | |
|  | |  | | | | |  | | |  | | | |  | | | | | | | | | | | | | |  | | | | | | | | |  | | | | | | |  | | | | | | | |  | | | | | | | |  | | | | |  | | | | |  | | |  | | | | |  | | | |  | | | | |  | | | | |  | | | |  | | | | | |  | | | | |  | | | | |  | | | |  | | | | |  | | | | |  | | | | |  | | | | | |  | | | |  | | | | | |  | | | | |  | | | | |  | | | | |  | | | | |  | | | | |  | | | | |  | | | | |  | | | |  | | | |  | | | |  | | |  | | | |  | | | |  | | | |  | | |  | | | | |  |  | | | | | |  | | | | |  | | | |  | | | |  |  | | | |  | | | |  | | | |
| **UBC 856** | | | | | | |  | | |  | | | |  | | | | | | | | | | | | | |  | | | | | | | | |  | | | | | | |  | | | | | | | |  | | | | | | | |  | | | | |  | | | | |  | | |  | | | | |  | | | |  | | | | |  | | | | |  | | | |  | | | | | |  | | | | |  | | | | |  | | | |  | | | | |  | | | | |  | | | | |  | | | | | |  | | | |  | | | | | |  | | | | |  | | | | |  | | | | |  | | | | |  | | | | |  | | | | |  | | | | |  | | | |  | | | |  | | | |  | | |  | | | |  | | | |  | | | |  | | |  | | | | |  |  | | | | | |  | | | | |  | | | |  | | | |  |  | | | |  | | | |  | | | |
| **A** | | **500** | | | | | 1 | | |  | | | | 1 | | | | | | | | | | | | | | 1 | | | | | | | | | 1 | | | | | | | 1 | | | | | | | | 1 | | | | | | | | 1 | | | | | 1 | | | | | 1 | | | 1 | | | | | 1 | | | | 1 | | | | | 1 | | | | | 1 | | | | 1 | | | | | | 1 | | | | | 1 | | | | | 1 | | | | 1 | | | | | 1 | | | | | 1 | | | | | 1 | | | | | | 1 | | | | 1 | | | | | | 1 | | | | | 1 | | | | | 1 | | | | | 1 | | | | | 1 | | | | | 1 | | | | | 1 | | | | | 1 | | | | 1 | | | | 1 | | | | 1 | | | 1 | | | |  | | | | 1 | | | | 1 | | | 1 | | | | | 1 | 1 | | | | | | 1 | | | | | 1 | | | | 1 | | | | 1 | 1 | | | | 1 | | | | 1 | | | |
| **B** | | **650** | | | | | 1 | | |  | | | | 1 | | | | | | | | | | | | | | 1 | | | | | | | | | 1 | | | | | | | 1 | | | | | | | | 1 | | | | | | | | 1 | | | | | 1 | | | | | 1 | | | 1 | | | | | 1 | | | | 1 | | | | | 1 | | | | | 1 | | | | 1 | | | | | | 1 | | | | | 1 | | | | | 1 | | | | 1 | | | | | 1 | | | | | 1 | | | | | 1 | | | | | | 1 | | | | 1 | | | | | | 1 | | | | | 1 | | | | | 1 | | | | | 1 | | | | | 1 | | | | | 1 | | | | | 1 | | | | | 1 | | | | 1 | | | | 1 | | | | 1 | | | 1 | | | |  | | | | 1 | | | | 1 | | | 1 | | | | | 1 | 1 | | | | | | 1 | | | | | 1 | | | | 1 | | | | 1 | 1 | | | | 1 | | | | 1 | | | |
| **C** | | **750** | | | | | 1 | | |  | | | | 1 | | | | | | | | | | | | | | 1 | | | | | | | | | 1 | | | | | | | 1 | | | | | | | | 1 | | | | | | | | 1 | | | | | 1 | | | | | 1 | | | 1 | | | | | 1 | | | | 1 | | | | | 1 | | | | | 1 | | | | 1 | | | | | | 1 | | | | | 1 | | | | | 1 | | | | 1 | | | | | 1 | | | | | 1 | | | | | 1 | | | | | | 1 | | | | 1 | | | | | | 1 | | | | | 1 | | | | | 1 | | | | | 1 | | | | | 1 | | | | | 1 | | | | | 1 | | | | | 1 | | | | 1 | | | | 1 | | | | 1 | | | 1 | | | |  | | | | 1 | | | | 1 | | | 1 | | | | | 1 | 1 | | | | | | 1 | | | | | 1 | | | | 1 | | | | 1 | 1 | | | | 1 | | | | 1 | | | |
